1           ***C. albicans* Zn Cluster Transcription Factors Tac1 and Znc1 are Activated by Farnesol to**  
2           **Up Regulate a Transcriptional Program Including the Multi-Drug Efflux Pump *CDR1***

3

4

5           Zhongle Liu<sup>b</sup>, John M. Rossi<sup>b</sup>, Lawrence C. Myers<sup>a,b,#</sup>

6

7           <sup>a</sup>Department of Medical Education and <sup>b</sup>Department of Biochemistry and Cell Biology, Geisel

8           School of Medicine at Dartmouth, Hanover, New Hampshire, USA

9

10          Running title: Farnesol activates *C. albicans* Tac1 and Znc1

11

12          #Address correspondence to Lawrence C. Myers, [larry.myers@dartmouth.edu](mailto:larry.myers@dartmouth.edu)

13          Tel.: (603) 650-1198 Fax: (603) 650-1128

14

15        **Abstract**

16        Farnesol, a quorum-sensing molecule, inhibits *C. albicans* hyphal formation, affects  
17        its biofilm formation and dispersal, and impacts its stress response. Several aspects  
18        of farnesol's mechanism of action remain incompletely uncharacterized. Among  
19        these are a thorough accounting of the cellular receptors and transporters for farnesol.  
20        This work suggests these themes are linked through the Zn cluster transcription  
21        factors Tac1 and Znc1, and their induction of the multi-drug efflux pump Cdr1.  
22        Specifically, we have demonstrated that Tac1 and Znc1 are functionally activated by  
23        farnesol through a mechanism that mimics other means of hyperactivation of Zn  
24        cluster transcription factors. This is consistent with our observation that many genes  
25        acutely induced by farnesol are dependent on *TAC1*, *ZNC1*, or both. A related  
26        molecule, 1-dodecanol, invokes a similar *TAC1/ZNC1* response, while several other  
27        proposed *C. albicans* quorum sensing molecules do not. *TAC1* and *ZNC1* both bind  
28        to and up-regulate the *CDR1* promoter in response to farnesol. Differences in  
29        inducer and DNA binding specificity lead to Tac1 and Znc1 having overlapping, but  
30        non-identical, regulons. *TAC1* and *ZNC1* dependent farnesol induction of their  
31        target genes was inversely related to the level of *CDR1* present in the cell, suggesting  
32        a model in which induction of *CDR1* by Tac1 and Znc1 leads to an increase in  
33        farnesol efflux. Consistent with this premise, our results show that *CDR1* expression,  
34        and its regulation by *TAC1* and *ZNC1*, facilitates growth in the presence of high  
35        farnesol concentrations in *C. albicans*, and certain strains of its close relative *C.*  
36        *dublinsiensis*.

37 **Introduction**

38 *Candida albicans* is a major opportunistic human fungal pathogen that can cause  
39 life-threatening systemic infections in immune-compromised individuals (1-3).  
40 Multiple important *C. albicans* virulence-related traits, including the morphological  
41 switch between yeast and hyphal growth (4, 5), biofilm formation and dispersal (6),  
42 interspecies communication with bacteria (7) and response to oxidative stress (8) can  
43 be modulated by its quorum sensing molecule (QSM), farnesol, the first identified  
44 QSM for eukaryotes (9-14).

45 Among multiple *Candida* species, *C. albicans* has been found to produce the most  
46 significant amounts of farnesol, followed by its close relative *C. dubliniensis* (15, 16).  
47 Dense cultures of *C. albicans*, in certain media, can accumulate farnesol to  
48 concentrations as high as 50  $\mu$ M (15, 16). The known mechanisms underlying the  
49 biological activity of farnesol in *C. albicans* include modulation of signaling  
50 pathways such as the Ras1-Cyr1/cAMP-PKA cascade in part via direct inhibition of  
51 Cyr1 (17-19). Farnesol exposure also results in a transcriptional response in *C.*  
52 *albicans* in both sessile and planktonic cells (12, 20-23).

53 Among the outstanding questions regarding farnesol activity in *C. albicans* are the  
54 existence of specific farnesol receptors and transporters (13). Adenylyl cyclase Cyr1  
55 is a cytoplasmic target of farnesol as it binds and is inhibited by farnesol (18).  
56 Transcription factors that directly respond to farnesol as a nuclear receptor/effector to  
57 regulate gene expression, however, have not been identified. Growth of *C. albicans*,  
58 in the 'white' cell form, is remarkably resistant to growth inhibition by high

59 concentration of farnesol, compared to other fungal species (14, 24). This property  
60 might result from an efficient farnesol efflux by certain transporter(s). The ABC  
61 (ATP-binding cassette) transporter *Cdr1* was found up-regulated upon 2-24 hour  
62 farnesol treatment (21, 22) and has been proposed to play a role in farnesol efflux (22).  
63 Expression of *CDR1* and another ABC transporter *CDR2* in *C. albicans* is regulated  
64 by the Zn(II)Cys6 transcription factor Tac1 (25). Gain of function mutations in *TAC1*  
65 are often found in clinical isolates of *C. albicans* that are resistant to treatment with  
66 azole drugs, due to high levels of *CDR1* expression (25-27). Tac1 binds to a 13  
67 base-pair drug-responsive-element (DRE) at the *CDR1* and *CDR2* promoters, and  
68 activates transcription upon acquisition of gain of function mutations, or treatment  
69 with certain xenobiotics such as fluphenazine (25, 26, 28). *C. albicans* *TAC1* gene  
70 locates in a 'zinc cluster region' on Chromosome 5 (25), where it neighbors two other  
71 transcription factors from its family, Hal9 and Znc1. Interestingly, Znc1, when  
72 activated artificially, also increases *CDR1* expression (30)

73 In this work we investigated whether Tac1 functions as a farnesol nuclear  
74 receptor/effector to activate *CDR1* expression, and searched for other transcription  
75 factors with a similar function. Our work showed that Tac1 and Znc1 contributed  
76 individually in and tandem to the transcriptional activation response to farnesol. We  
77 also found that *CDR1* expression, and its regulation by *TAC1* and *ZNC1*, facilitates  
78 growth in the presence of farnesol in both *C. albicans* and *C. dubliniensis*.

79

80

81 **Results**

82

83 **Farnesol and 1-Dodecanol rapidly induce *CDR1* expression.**

84 Since specific xenobiotic inducers evoke an acute activation of the *C. albicans* *CDR1*  
85 promoter (28, 31), we tested whether the known physiologic inducer of *CDR1*,  
86 farnesol (FOH), also led to a rapid transcriptional induction of the efflux pump gene.  
87 FOH addition to exponentially growing cells led to an increase in *CDR1* mRNA  
88 expression with an amplitude and temporal pattern comparable to fluphenazine (FNZ),  
89 a well-studied inducer of *CDR1* (Fig. 1A). FOH induces *CDR1* expression in a dose  
90 dependent manner, starting at concentrations as low as 4  $\mu$ M (Fig. 1B). The 12-carbon  
91 backbone and hydroxyl group of FOH are required for its full inhibition of *C.*  
92 *albicans* hyphal growth (9, 32). Several different terpene alcohols and FOH  
93 derivatives were tested for their ability to rapidly induce *CDR1*. Geraniol and  
94 farnesyl acetate are unable to induce levels of *CDR1* expression comparable to FOH  
95 (Fig. 1C). 1-Dodecanol (1-DD), however, another 12-carbon molecule that inhibits  
96 hyphal growth (33) induces *CDR1* expression at similar concentrations to FOH (Fig.  
97 1C). Tryptophol (Fig. 1C), an aromatic amino acid derived alcohol with fungal  
98 quorum sensing activity (34, 35), and tyrosol (Fig. S1), another *C. albicans* quorum  
99 sensing molecule (34), do not induce *CDR1*. Tracking the expression of a 3xHA  
100 tagged *CDR1* allele by immunoblot analysis confirmed that FOH and 1-DD also  
101 induced Cdr1 at the protein level (Fig. 1D). Cdr1 protein levels, especially in  
102 response to FNZ and FOH, appear to stay at the peak induced level longer than the

103 mRNA, indicating that Cdr1 is fairly stable.

104

105 **Tac1 is required for the induction of some, but not all, FOH and 1-DD target**  
106 **genes**

107 Induction of *CDR1*, *CDR2* and *RTA3* by xenobiotics, such as FNZ and estradiol, is  
108 dependent on the zinc cluster transcription factor Tac1 (25, 28, 30, 36). The  
109 observation that *CDR1*, *CDR2* and *RTA3* expression was induced by FOH and 1-DD  
110 treatment (Fig. 1A, 2A and 2B) suggested Tac1 hyperactivation as a mechanism for  
111 FOH and 1-DD induced transcription. Unlike FNZ induction of *CDR1*, *CDR2* and  
112 *RTA3*, which was entirely Tac1 dependent, only FOH and 1-DD induction of *CDR2*  
113 was entirely dependent on Tac1 (Fig. 2A to 2C). The residual *CDR1* induction, and  
114 virtually unaffected *RTA3* induction, suggests that additional transcription factors  
115 respond to FOH and 1-DD at these promoters.

116

117 **Znc1 contributes to the induction of multiple FOH and 1-DD target genes**

118 The first candidate transcription factor that we tested for Tac1-independent induction  
119 of *CDR1* and *RTA3* by FOH (and 1-DD) was Znc1. Znc1 is a zinc cluster  
120 transcription factor that is encoded adjacent to *TAC1*, and whose sequence bares the  
121 greatest similarity to Tac1 of all other members of the *C. albicans* zinc cluster  
122 transcription factor family (Candida Genome Database; (25)). Znc1 was previously  
123 identified as a potential regulator of *CDR1* and *RTA3* in an experiment in which a  
124 potent activation domain was fused to the full-length wild type Znc1 (30). *RTA3*

125 induction by FOH and 1-DD was decreased in a *znc1Δ/Δ* strain, while *RTA3* induction  
126 by FNZ was largely unaffected (Fig. 3A). FNZ, FOH and 1-DD induction of *CDR1*  
127 was largely unaffected in the *znc1Δ/Δ* strain, however FOH and 1-DD induction of  
128 *CDR1* and *RTA3* was decreased in a *tac1Δ/Δ znc1Δ/Δ* strain compared to either single  
129 mutant (Fig. 3A and 3B). The pattern of Cdr1 protein expression was consistent  
130 with the epistasis analysis of *CDR1* mRNA expression in the *tac1* and *znc1* strains  
131 (Fig. 3C). FOH induction of *CDR1* in the *tac1Δ/Δ znc1Δ/Δ* strain was restored by  
132 complementation with either *TAC1* or *ZNC1* (Fig. 3D), while *CDR2* induction was  
133 only restored upon *TAC1* complementation (Fig. 3E).

134  
135 In addition to *CDR1* and *RTA3*, the previous Znc1-activation domain fusion analysis  
136 (30) suggested that several other genes, including orf19.320 and *IFD1* (orf19.4476),  
137 were direct Znc1 targets. Both orf19.320 and *IFD1* are induced by FOH and 1-DD,  
138 but not by FNZ (Fig. 3F and 3G). Induction of orf19.320 and *IFD1* by FOH and 1-DD  
139 was *ZNC1* dependent, but not affected by *TAC1* (Fig. 3H). Consistent with these  
140 results, FOH induction of orf19.320 in a *tac1Δ/Δ znc1Δ/Δ* strain was restored by  
141 re-introduction of *ZNC1*, but not *TAC1* (Fig. 3H).

## 142 143 **Hyperactivation of Tac1 and Znc1 by farnesol and 1-dodecanol**

144 The mechanism by which small molecules regulate the ability of Tac1, as well as  
145 other members of the *PDR1* family, to activate transcription has not been clearly  
146 defined. Direct binding to these small molecules/xenobiotics has been shown, in the

147 case of *C. glabrata PDR1* (37), to play an important role in this process. Among the  
148 strongest pieces of evidence for direct xenobiotic hyperactivation in *C. albicans* is the  
149 finding that a heterologous DNA binding domain fused to Tac1 (minus the DNA  
150 binding domain) activated reporter genes in response to xenobiotic (29, 31). We  
151 used a *C. albicans* one-hybrid assay to test whether Tac1 or Znc1, with its native  
152 DBD replaced by the LexA DBD, could activate a LacZ reporter in response to FOH  
153 and 1-DD. The LexA-Tac1 fusion protein activated its reporter gene in response to  
154 both FOH and 1-DD at levels comparable to, although somewhat lower than, the  
155 levels previously observed (31) for FNZ (Fig. 4A). The LexA-Znc1 construct  
156 induces the LacZ reporter in response to FOH and 1-DD, but doesn't respond to  
157 treatment with FNZ. The fold activation by FOH and 1-DD are similar for  
158 LexA-Znc1 and LexA-Tac1, while the LexA-Znc1 has a basal activation potential that  
159 is slightly higher than the Tac1 construct. Hal9, the *C. albicans* transcription factor  
160 with next highest similarity to Tac1 and Znc1, fused to LexA does not activate the  
161 reporter in response to FNZ, FOH or 1-DD (Fig. 4).

162  
163 Hyperactivation of Tac1 tightly correlates with its phosphorylation by the Mediator  
164 complex, and can be detected by a decrease in gel mobility (5). FOH and 1-DD  
165 treatment both result in an N-terminal HisFlag tagged Tac1 mobility shift that is  
166 slightly lower than the shift caused by FNZ (Fig. S2A). The Tac1 band shift by FOH  
167 is unaffected in *znc1* deletion mutant (Fig. S2B), ruling out a potential competitive  
168 effect by hyperactivated Znc1. The variability of Tac1 phosphorylation pattern



169 suggests inducer specific conformations of hyperactive Tac1 that lead to differential  
170 phosphorylation by Mediator. To test if hyperactivated Znc1 is also subject to  
171 phosphorylation, we generated strains expressing C-terminally 3xHA tagged Znc1.  
172 The tagging does not compromise Znc1 activation competence at the *CDR1* and  
173 *orf19.320* promoters (Fig. S2C and S2D). As opposed to Tac1, FOH or 1-DD  
174 treatment does not induce detectable changes in Znc1-3HA mobility in either wild  
175 type or *tac1* deletion background (Fig. S2A and S2E).

176

177 **Tac1 and Znc1 promoter occupancy correlates with their impact on target gene**  
178 **induction by FOH.**

179 ChIP analysis was performed to test whether Tac1 and Znc1 promoter occupancy  
180 determined their FOH induced target gene specificity. Tac1 and Znc1 occupancy are  
181 enriched at the *CDR1* DRE in the absence of inducer, and this occupancy is enhanced  
182 by treatment with FOH (Fig. 5A). There is also a weak, but reproducible,  
183 enrichment of Tac1 and Znc1 occupancy at the *RTA3* DRE under non-inducing  
184 conditions. Similar to our observation that Znc1 was the primary regulator of *RTA3*  
185 expression in response to FOH, only Znc1 occupancy at the *RTA3* DRE was increased  
186 by treatment with FOH (Fig. 3B). Tac1 and Znc1 occupancy were specific to the  
187 *CDR2* and *orf19.320* promoters, respectively, under non-inducing conditions and  
188 were enhanced by induction with FOH (Fig. 5C and 5D). Another Znc1 dependent  
189 promoter, *IFDI*, is exclusively bound by Znc1, but only after FOH treatment (Fig.  
190 5E). The ChIP assay results allowed identification of potential *cis* elements for Znc1

191 at the tested promoters. High Znc1 occupancy at the *CDR1* and *RTA3* DRE suggests  
192 DNA binding preference of Znc1 similar to that of Tac1. Thirteen base pair (bp)  
193 DRE-like CGG triplet sequences were found in the *orf19.320* and *IFD1* promoter  
194 regions, whose location correlated to the region of highest local enrichment for Znc1  
195 ChIP signal. Thus, we refer to these 13 bp elements as potential Znc1 binding  
196 motifs (PZMs). DREs and PZMs in the tested genes share a core consensus of  
197 CGGNNNNCGGAN (Fig. 5F). Multiple bases found in PZMs (labeled red in Fig.  
198 5F) have been reported to impair *CDR2* DRE function (26), and may specifically  
199 reduce Tac1 binding. The ChIP (Fig. 5B) and expression analysis (Fig. 3A) suggest  
200 that one such nucleotide in the *RTA3* DRE, P12 A, may be better tolerated by the  
201 Znc1 DBD than the Tac1 DBD. One model for the partially redundant function of  
202 Tac1 and Znc1 at the *CDR1* promoter is that both transcription factors competently  
203 bind to the *CDR1* promoter in the absence of the other. To test this hypothesis we  
204 performed Znc1 ChIP in a *tac1Δ/Δ* strain. Znc1 occupancy is observed at the *CDR1*,  
205 *RTA3* or *orf19.320* promoters in a *tac1Δ/Δ* strain, and even increases at the *CDR1*  
206 DRE (Fig. 5G) compared to a wild type *TAC1* strain. This last finding indicates Tac1  
207 and Znc1 may compete for DRE binding at promoters where we detected  
208 co-occupancy. Additionally we have found in ChIP assays that FNZ treatment has  
209 only a minor effect on Znc1 occupancy compared to its effect on Tac1 at the *CDR1*  
210 promoter (Fig. S3A), or the effect of FOH/1-DD on Znc1 occupancy at the *RTA3*  
211 promoter (Fig. S3B). Previous studies have shown that Tac1 GOF mutants can  
212 confer fluconazole resistance through a mechanism that relies on the ability of Tac1 to

213 bind and activate the *CDRI* promoter (25, 26, 28, 31). We have found that the  
214 fluconazole MIC in *TAC1<sup>GOF</sup>* mutant strains does not decrease in *znc1Δ/Δ* strain  
215 (Table S1). Collectively, this evidence supports the hypothesis that Tac1 and Znc1  
216 bind promoters independently of each other.

217

218 **FOH induced Znc1 works through a Mediator dependent co-activator**  
219 **mechanism**

220

221 Our previous work showed recruitment of Mediator complex is critical to FNZ  
222 induced Tac1 dependent *CDRI* activation (31). Here, we found the Mediator tail  
223 module is also important for FOH induced *CDRI* expression (Fig. 6A) and that either  
224 Tac1 or Znc1 is competent for Mediator recruitment at the *CDRI* DRE under these  
225 conditions (Fig. 6B). Therefore, Tac1 and Znc1 both show DRE binding and  
226 Mediator recruitment at the *CDRI* promoter in the presence of FOH that is  
227 independent of the other.

228

229 **Additional transcription factors regulate FOH and 1-DD induced transcription**  
230 **in a promoter specific manner.**

231 Despite the FOH induction of *CDRI* being severely compromised in the *tac1Δ/Δ*  
232 *znc1Δ/Δ* strain, a small residual induction was observed in this background (Fig. 7A).

233 This finding suggested that another transcription factor was involved in *CDRI*

234 activation by certain inducers. A genetic screen of zinc cluster transcription factors

235 identified Mrr2, Stb5 and Cta4 as potential regulators of *CDR1* (30). The *tac1 znc1*  
236 *cta4* and *tac1 znc1 stb5* triple deletion mutants showed unaffected FOH and 1DD  
237 induction of all genes tested, compared to a *tac1 znc1* double null strain (Fig. 7A).  
238 Deletion of *mrr2*, however, largely eliminates the residual induction of *CDR1* mRNA  
239 by FOH (and 1-DD) in the *tac1Δ/Δ znc1Δ/Δ* strain (Fig. 7A), while deletion of *mrr2*  
240 also compromises *CDR1* activation by FNZ, FOH and 1-DD when Tac1 and Znc1 are  
241 both present (Fig. 7B). Deletion of *mrr2* in the *tac1Δ/Δ znc1Δ/Δ* background also  
242 decreases induced Cdr1 protein levels (Fig. 7C). Interestingly, *mrr2* deletion appears  
243 to cause a greater decrease in the induced Cdr1 protein levels compared to mRNA  
244 levels (Fig. 7B and 7C), suggesting Mrr2 may also regulate *CDR1*  
245 post-transcriptionally. In addition to *CDR1*, the genes *CDR2* (Fig. 2A), *PDR16* (Fig.  
246 S4A), *orf19.7042* (Fig. S4B) and *orf19.344* (Fig. S4C) are dependent on *TAC1*, *ZNC1*  
247 or a combination of the two under different induction conditions (30). Deletion of  
248 *mrr2*, *stb5* or *cta4* did not impact the expression of these additional Tac1/Znc1 target  
249 genes when we assayed their induction in a *tac1Δ/Δ znc1Δ/Δ* background (Fig S4D-F).  
250 Likewise deletion of *mrr2* in an otherwise wild type background did not compromise  
251 induction of the tested Tac1/Znc1 target genes, other than *CDR1*, by FNZ, FOH or  
252 1-DD (Fig S4G-K). Among the genes tested, Mrr2 functions as a specific modulator  
253 of *CDR1* expression, rather than a broad regulator of FOH and 1-DD induction. The  
254 transcription factor(s) responsible for the residual FOH or 1-DD induction of *PDR16*,  
255 *orf19.7042* and *orf19.344* in the *tac1Δ/Δ znc1Δ/Δ* strains remain unidentified. Fig.  
256 7D provides a heat map summary of the impact of Tac1, Znc1 and Mrr2 on

257 expression of the fluphenazine, farnesol and 1-dodecanol induced genes analyzed in  
258 this work.

259

### 260 **Cdr1 mediated feedback regulation of the transcriptional FOH response.**

261 It has been proposed that *C. albicans* Cdr1 can decrease intracellular FOH  
262 concentration via its efflux pump activity (22). This led us to hypothesize that FOH  
263 induced *CDR1* expression may be part of a negative feedback mechanism to  
264 down-regulate the cellular response to FOH. To test whether increased *CDR1*  
265 expression down-regulated the transcriptional response to FOH, we compared FOH  
266 induced gene expression in a wild type and *cdr1* deletion background. In a *cdr1Δ/Δ*  
267 strain, *CDR2*, orf19.320 and orf19.344 are all expressed at higher levels by the same  
268 concentration of exogenous FOH (Fig. 8A). *cdr2* deletion does not affect FOH  
269 induction, and had a minimal effect when combined with *cdr1* deletion, suggesting  
270 *CDR1* plays a specific role in modulating this response. Based on this finding we  
271 sought to determine whether the efficiency of Cdr1-mediated xenobiotic transport  
272 governed the transcriptional response to other small molecules. Farnesyl acetate, an  
273 FOH like molecule, causes little to no induction of FOH-inducible promoters in a  
274 wild-type strain (Fig. 8B). In the absence of *CDR1*, however, farnesyl acetate and  
275 FOH result in comparable induction of several FOH target genes (Fig. 8B). This  
276 finding suggests that the Cdr1 dependent transport of farnesyl acetate, rather than an  
277 inability to activate the relevant transcription factors, is the limiting factor a response  
278 to farnesyl acetate. Compared to FOH induction curve that peaks and then decreases,

279 the induction curve for farnesyl acetate in the *cdr1* null shows a plateau or gradual  
280 increase (Fig. 8A-B). Similar to FOH, 1-DD treatment induces higher levels of  
281 target gene expression in the absence of *cdr1* (Fig. S5A and S5B), while geraniol and  
282 tryptophol do not (Fig. S5C). Deletion of *cdr1* only enhances the FOH/1-DD  
283 response to specific inducers rather than a pool of broadly related molecules. The  
284 *CDR1* facilitated negative feedback model predicts that the increase in FOH target  
285 gene expression in the *cdr1* null strain will also be dependent on Tac1 and Znc1.  
286 Indeed, FOH induction in wild type and *cdr1Δ/Δ* strains exhibits a similar dependence  
287 on *TAC1* and *ZNC1* (Fig. 8C and Fig. S4D-F). The negative feedback model also  
288 predicts that over-expression of Cdr1 would increase farnesol efflux and desensitize *C.*  
289 *albicans* to FOH induction. A strain carrying a *TAC1* GOF allele, which  
290 over-expresses *CDR1*, showed dramatically lower degree of Znc1 target gene  
291 induction than a wild type strain at identical concentrations of FOH (Fig. 8D). These  
292 results further support a model where FOH induced Cdr1 expression facilitates FOH  
293 clearance.

294

### 295 ***Cdr1* facilitates *C. albicans* and *C. dubliniensis* resistance to FOH exposure.**

296 *C. albicans*, is able to tolerate significantly higher levels of exogenous FOH compared  
297 to other ascomycetes, through a mechanism that is not entirely understood (13, 14, 24).  
298 To determine whether the *CDR1* transcriptional response pathway described above  
299 could detoxify FOH, we investigated the role of Cdr1 in *C. albicans* FOH survival.  
300 Under the conditions tested, our *C. albicans* wild type strain did not exhibit a major

301 decrease in colony size when grown on YPD agar containing 200  $\mu$ M FOH (Table 1).  
302 The growth of a *cdr1* deletion strain, however, was compromised or completely  
303 inhibited at 50 or 100  $\mu$ M FOH (Table 1). Colony growth, within the FOH  
304 concentration range tested, was not affected in a *cdr2* null strain. FOH tolerance,  
305 however, was further decreased in a *cdr1 $\Delta/\Delta$  cdr2 $\Delta/\Delta$*  strain versus a *cdr1 $\Delta/\Delta$*  strain.  
306 Consistent with this finding, deletion of *tac1* further sensitizes a *cdr1* null mutant to  
307 FOH, while *TAC1* GOF mutants, which overexpress Cdr2, increase FOH tolerance in  
308 a *cdr1 $\Delta/\Delta$*  strain in a manner that is dependent on *CDR2* (Table 1). A killing assay  
309 was performed to determine if FOH inhibits growth of *cdr1* deletion mutants through  
310 a fungistatic or fungicidal effect. The *cdr1 $\Delta/\Delta$  cdr2 $\Delta/\Delta$*  strain showed decreased  
311 viability upon treatment with 200  $\mu$ M FOH as only  $\sim$ 1% mutant cells survived after 6  
312 hours treatment (Fig. 9A). Identical treatment with vehicle had no effect on viability  
313 (Fig. S6A) The viability of the *cdr1 $\Delta/\Delta$  cdr2 $\Delta/\Delta$*  and *cdr1 $\Delta/\Delta$*  strains decrease at a  
314 similar rate during the first 6 hours of FOH exposure. Deletion of the transcription  
315 factors that drive FOH induction of *CDR1* and *CDR2* had a lesser impact on viability  
316 after FOH exposure than complete deletion of *CDR1* and *CDR2* (Fig. 9A). Deletion  
317 of *tac1*, *znc1* and *mrr2* individually, or *tac1 znc1* simultaneously, does not affect FOH  
318 tolerance (Table 1). The *tac1 $\Delta/\Delta$  znc1 $\Delta/\Delta$  mrr2 $\Delta/\Delta$*  strain, however, showed mildly  
319 compromised colony formation and decreased cell growth upon FOH exposure (Table  
320 1, Fig. 9B). There was no difference in growth sensitivity of the wild type and the  
321 *cdr1 $\Delta/\Delta$  cdr2 $\Delta/\Delta$*  strains to SDS, indicating that the mutants did not impact the  
322 membrane integrity of the cells (Fig. S6B).

323

324 The *C. dubliniensis* genome sequencing strain CD36, a close relative of *C. albicans*,  
325 has been reported to have much higher sensitivity to FOH induced cell death (24). It  
326 is also known that multiple *C. dubliniensis* strains within genotype group I, including  
327 CD36, do not express functional full length Cdr1 protein due to a homozygous variant  
328 that creates a stop codon at *CDR1* amino acid 756 (38). All *cdr1*<sup>756stop/756stop</sup> *C.*  
329 *dubliniensis* strains (CD36, CD38 and Wü284) we tested showed complete or partial  
330 growth inhibition by 50 µM FOH (Table 2; Fig. 9C). There are multiple *CDR1*<sup>+/+</sup> *C.*  
331 *dubliniensis* strains (such as CD57), and we have observed that they exhibit  
332 comparable resistance to *C. albicans* at FOH levels as high as 200 µM (Table 2; Fig.  
333 9C). Additionally we have found that deletion of *cdr1* sensitizes CD57 to farnesol,  
334 while deletion of *cdr1* in the *cdr1*<sup>756stop/756stop</sup> strain Wü284 does not further sensitize it  
335 to farnesol (Table 2).

336

337 **Tac1 and Znc1 mediate the *CDR1* the transcriptional FOH response in *C.***  
338 ***dubliniensis*.**

339 Our standard protocol showed that FOH induces *CDR1* expression in CD57 with  
340 similar kinetics and amplitude to *C. albicans* (Fig. 10A). Although CD57 showed an  
341 extremely low expression level of *CdCDR2* compared to its *C. albicans* ortholog,  
342 FOH treatment results in a comparable fold induction of *CDR2* in the two species (Fig.  
343 10A). The ortholog of orf19.320, a *C. albicans* Znc1 dependent promoter, in *C.*  
344 *dubliniensis* (Cd36.83180) had an expression pattern in which induction was only



345 observed after one hour of FOH treatment (Fig. 10A). A LexA-*Cd*Tac1 fusion protein,  
346 constructed in a similar fashion to the earlier LexA-*Ca*Tac1 fusion (Fig. 4), activated  
347 LacZ expression upon FOH and FNZ treatment when tested in one hybrid reporter  
348 assay in *C. albicans* (Fig. 10B). Representatives of the three different classes of  
349 FNZ/FOH induced promoters defined in *C. albicans*, Tac1/Znc1 dependent (*CDR1*),  
350 Tac1 dependent (*CDR2*) and Znc1 dependent (Ca orf19.320/Cd36\_83180), have a  
351 very similar dependence on these same transcription factors in *C. dubliniensis* (Fig.  
352 10C). An exception was the observation that deletion of *znc1* in the *tac1Δ/Δ* CD57  
353 strain did not decrease FOH *CDR1* induction as strongly as it does in *C. albicans*,  
354 suggesting the existence of other regulator(s) governing FOH induction of the  
355 *CdCDR1* promoter.

356

## 357 **Discussion**

358 Our characterization of Tac1, Znc1 and Mrr2 as essential signal targets (direct or  
359 indirect) for farnesol provides a new framework for thinking about how the *C.*  
360 *albicans* cell coordinates its transcriptional response to the quorum-sensing molecule.  
361 The demonstration that multiple Zn Cluster transcription factors can be activated by  
362 overlapping, yet non-redundant, small molecules reveals a previously  
363 underappreciated combinatorial complexity that allows these factors to regulate  
364 complex patterns of gene regulation. Additionally, the dependence of *CDR1*  
365 expression on this transcriptional response combined with the regulation of this  
366 response by the action of this important efflux pump supports the mounting evidence

367 for *CDR1* serving as a farnesol transporter and suggests the presence of a negative  
368 feedback loop modulating its action.

369

### 370 **Tac1 and Znc1 act as targets in *Candida* for farnesol**

371 Earlier work had indicated that *CDR1* expression was up regulated upon treatment  
372 with farnesol (21, 22), and that Tac1 was an important regulator of *CDR1* (25, 27).

373 This work demonstrates that farnesol can activate an acute transcriptional response

374 via the hyperactivation of Tac1 and Znc1. The kinetics and amplitude of this

375 response is very similar to the well-characterized response of Tac1 to xenobiotics,

376 such as fluphenazine and estradiol (28), and expands the range of *C. albicans* Tac1

377 hyper-activators into the realm of physiological small molecules. Our discovery that

378 farnesol can lead to the up regulation of *CDR1* through the hyperactivation of Znc1

379 reveals that the control of the efflux pump expression is more complex than

380 previously appreciated. The finding that Tac1 and Znc1 share overlapping, but

381 non-identical, targeting to sequences in the promoter elements in farnesol induced

382 genes extends our knowledge of how a diverse set of genes can be upregulated via

383 farnesol. It is uncertain, at this point, whether farnesol activates Tac1 and Znc1

384 through a direct binding mechanism, similar to the activation of Pdr1 in *C. glabrata*

385 by azoles (37), or through an indirect mechanism such as post-translational

386 modification. The observed sub-cellular localization of exogenously-added farnesol

387 includes nuclear enrichment (39), which would allow farnesol to hyperactivate Tac1

388 and Znc1 through direct binding. Parallels have previously be drawn between the

389 mechanism of action of the *C. glabrata* Pdr1 zinc cluster transcription factor and  
390 mammalian nuclear receptors (37, 40), and it is interesting to note that the mammalian  
391 bile acid receptor FXR (Farnesoid X-activated Receptor) is also activated by farnesol  
392 (41). However, strong physiological FXR agonists, such as chenodeoxycholic acid  
393 (CDCA) and deoxycholic acid (DA) (42, 43), do not activate *CDRI* expression in *C.*  
394 *albicans* (Fig. S1), suggesting the lack of a boarder overlap between Tac1/Znc1 and  
395 mammalian FXR inducers. If direct binding of inducers to the Zn cluster  
396 transcription factors is the mechanism of hyperactivation, the structural differences  
397 between Tac1 inducers (farnesol, dodecanol, fluphenazine, estradiol) suggest a low  
398 affinity/specificity interaction similar to that observed for the FXR receptor. The  
399 observation that Znc1 can respond to farnesol (and dodecanol), but not fluphenazine,  
400 indicates that it is possible for the Zn cluster transcription factors to make structural  
401 distinctions between these molecules. Although we cannot rule out  
402 post-translational modification as a mechanism, the absence of a mobility shift in  
403 Znc1 upon farnesol treatment compared to the hyperactive Tac1 phosphorylation  
404 mobility shift (31) suggests that phosphorylation is not a requirement for farnesol  
405 activation of Tac1 and Znc1.

406

#### 407 **Mode of Tac1- and Znc1-DNA interaction**

408 In fungi, paralogous zinc cluster transcription factors have been reported to form both  
409 homo- and hetero-dimers, for example Pdr1/Pdr3 (44) and Oaf1/Pip2 (45, 46) in *S.*  
410 *cerevisiae*. Our observation of distinct binding of Tac1 and Znc1 at promoters where

411 they show non-redundant activation, as well as the binding of Znc1 to promoters in a  
412 *tac1* null strain, does not support the idea that Tac1 and Znc1 bind promoters as a  
413 stable heterodimer. The previous observation that Tac1 requires the presence of  
414 both CGG triplet elements in a DRE for gene activation (26) largely rules out the  
415 possibility that monomeric Tac1 and Znc1 each bind to one CGG triplet in a single  
416 DRE, a mode of DNA binding infrequently observed for zinc cluster transcription  
417 factors (47). The evidence presented here supports a model where Tac1 homodimers  
418 and Znc1 homodimers competitively bind to co-regulated promoters at a single paired  
419 CGG triplet element. Given the variation in DRE and PZM sequences at Tac1  
420 dependent promoters (*i.e.* *CDR2*) and Znc1 dependent promoters (*i.e.* *orf19.320*), it is  
421 likely that Tac1 and Znc1 have overlapping, but non-identical sequence specificity.  
422 The DNA binding specificity of zinc cluster transcription factors, namely the  
423 sequence between and surrounding the CGG triplet(s), is thought to be determined by  
424 the amino acid sequence in the linker region between the zinc clusters and the  
425 dimerization domain (48-50). Divergence in Tac1 and Znc1 in their linker regions  
426 may contribute to their different occupancy at the DREs and PZMs. Since it has  
427 previously been noted that Tac1 binds to DREs regardless of the promoter status (36)  
428 it was reasonable to think that hyperactivation of Tac1 did not work by a mechanism  
429 that increased DNA binding of the transcription factor. The ChIP analysis shows,  
430 however, that DRE/PZM occupancy is clearly increased in an inducer specific manner.  
431 It is unclear whether this reflects a direct increase in binding affinity of the  
432 transcription factor or the formation of a more stable transcription factor complex

433 involving interactions with co-activators and enhanced chromatin remodeling.

434

### 435 **The complex regulation of the *CDR1* promoter**

436 The new regulatory mechanisms revealed by our study further demonstrate the  
437 complexity of the *CDR1* promoter. Previous studies of activation of the *CDR1*  
438 promoter have focused on gain-of-function mutants in Tac1, or xenobiotic  
439 hyperactivation of Tac1(25, 26, 28, 51). Our study now adds farnesol and  
440 1-dodecanol treatment to the limited number of conditions where *CDR1* expression  
441 can be induced chemically in the absence of Tac1 (29). Tac1-independent *CDR1*  
442 induction by farnesol can be largely attributed to Znc1 (and Mrr2) function.  
443 Interestingly, unlike Tac1 (27) and Mrr2 (52), no gain-of-function mutants of Znc1  
444 have been reported to drive azole resistance in *C. albicans*. Of the well-characterized  
445 *CDR1* inducers, farnesol is the only one considered to be a *C. albicans* metabolite.

446 Identification of Tac1 and Znc1 as farnesol induced transcription activators of the  
447 *CDR1* promoter allowed us to test whether the proposed *CDR1* mediated farnesol  
448 efflux (22) provided feedback to the transcriptional response. The amplification of  
449 the Tac1 and Znc1 driven transcriptional response to farnesol in cells lacking Cdr1  
450 function, as well as the dampening of the Znc1 driven transcriptional response to  
451 farnesol in *TAC1* gain of function cells that overexpress *CDR1* (Fig. 8), both support  
452 the idea of Cdr1 serving to regulate intracellular levels of farnesol via an efflux  
453 mechanism. However, the observation that the transcriptional response to farnesol  
454 still exhibits attenuation after rapid induction in a *cdr1* null strain (Fig. 8) indicates

455 that there may be additional farnesol transporters in *C. albicans*. The contrast of this  
456 response compared to the plateau observed for the transcriptional response to farnesyl  
457 acetate in *cdr1* null strain indicates that Cdr1 may be the sole efflux pump for farnesyl  
458 acetate (Fig. 8B).

459

### 460 **The role of *CDR1* in modulating farnesol sensitivity**

461 Although the phenotypic regulation of *C. albicans* by farnesol is not the central focus  
462 of the work presented here, the suggested circuit involving farnesol, Zn cluster  
463 transcription factors and Cdr1 prompted us to begin to investigate how these factors  
464 might interact to influence *Candida* biology. Under our experimental conditions  
465 (cells grown in YPD), as well as synthetic media conditions tested in several other  
466 studies (53-55), farnesol concentrations as high as 300  $\mu$ M showed minor effects on  
467 the growth or viability of wild type *C. albicans*. These concentrations of farnesol are  
468 typically toxic to most other fungi (14, 24). Our analysis of farnesol toxicity to *C.*  
469 *albicans* and *C. dubliniensis* strains with and without functional Cdr1 consistently  
470 suggests Cdr1 mediated farnesol efflux plays a protective role under these growth  
471 conditions (Fig. 9, Table 1 and 2). It is somewhat surprising that transcription factor  
472 mutants in *C. albicans* and *C. dubliniensis* do not show a more dramatic change in  
473 farnesol sensitivity given the decrease in *CDR1* induction. It is possible that  
474 expression of other genes that influence farnesol sensitivity were affected by *tac1* or  
475 (and) *znc1* or (and) *mrr2* deletion in a way that compensated for the compromised  
476 *CDR1* induction in these mutants. Elsewhere it has been reported that farnesol

477 treatment in a non-media condition (PBS) induced apoptosis in *C. albicans* through a  
478 Cdr1-dependent mechanism (22), suggesting Cdr1 may regulate *C. albicans* farnesol  
479 sensitivity in either direction depending on the treatment condition. Since Cdr1, an  
480 ATP-dependent transporter, activity is strongly affected by cellular energy status (56,  
481 57), the availability of many nutrients impact the role of Cdr1 during farnesol  
482 exposure.

483 This results of this study lead to the ability to ask new questions about both the  
484 general role and mechanism of zinc cluster transcription factors in the response to  
485 physiological fungal metabolites, as well as the action of farnesol as a quorum sensing  
486 molecule. For instance, how do Tac1 and Znc1 achieve specificity in their response  
487 to farnesol? are there other metabolite ligands? and do the other genes in the  
488 Tac1/Znc1 farnesol regulon play an important role in quorum sensing. It has been  
489 observed that an increase in *CDR1* and *CDR2* expression in sessile *C. albicans* cells,  
490 compared to planktonic cells (58, 59) contributes to the drug resistance in early *C.*  
491 *albicans* biofilm, in cooperation with the up regulation of major facilitator transporter,  
492 *MDR1* (60) . The mechanism underlying the induction of these pumps in biofilm has  
493 not been clarified. Farnesol induction of *CDR1* and *CDR2* suggests accumulation of  
494 quorum sensing molecule favored by static growth as a possible answer.

495

## 496 **Materials and Methods**

497

### 498 **Strains and plasmids**

499 Strains and plasmids used in this study are respectively listed in Table S2 and Table  
500 S3. Construction of the strains and plasmids are described, in detail, in the  
501 ‘Supplemental Methods’ session. Primers used for generating the strains and plasmids  
502 are listed in Table S4. *C. albicans* transformation was performed by electroporation  
503 and selected by Clonate resistance (1% Yeast extract, 2% Peptone, 2% Glucose, 2%  
504 Agar, 0.1 mM Uridine, 100 µg/mL Clonate) or complementation of auxotrophy (6.7  
505 g/L Difco YNB without amino acids (BD), appropriately supplemented 1.5 g/L  
506 Drop-out Mix Synthetic without uracil, histidine, arginine, leucine (US Biological), 2%  
507 Glucose, 2% Agar). Expression of flippase was induced by growth in YPMal (1%  
508 Yeast extract, 2% Peptone, 2% Maltose, 0.1 mM Uridine) liquid media for 24 hours.  
509 Successful eviction of the *SAT1* marker was selected by sensitivity to 100 µg/mL  
510 Clonate.

511

### 512 **Cell growth and drug treatment**

513 Cells were grown in liquid YPD media (1% Yeast extract, 2% Peptone, 2% Glucose,  
514 0.1 mM Uridine) at 30°C if not specified. Drug treatment was performed by adding  
515 fluphenazine (Alfa Aesar, 6 mg/mL aqueous stock), farnesol (MP bio (mixed  
516 isoforms), biweekly 50 mM or fresh 200 mM methanolic dilution), 1-Dodecanol  
517 (Sigma, 50 mM methanolic dilution), farnesyl acetate (Fluka (mixed isoforms), 50  
518 mM methanolic dilution), geraniol (Sigma, 50 mM methanolic dilution), tryptophol  
519 (Sigma, 50 mM methanolic stock), tyrosol (Alfa Aesar, 50 mM aqueous stock),  
520 chenodeoxycholic acid (Cayman, 50 mM DMSO stock) or deoxycholic acid (Fisher,



521 50 mM DMSO stock) into mid-log phase *C. albicans* or *C. dubliniensis* culture to the  
522 final concentration specified for each experiment in the figure legends. To test cell  
523 growth in the presence of farnesol, an overnight culture, after appropriate dilution,  
524 was spread on YPD plates supplemented with each concentration of FOH or same  
525 volume of methanol. Colony number and size were analyzed by OpenCFU (62) after  
526 40 hours incubation at 30°C. In farnesol killing assays, an overnight culture of each  
527 strain to be tested was diluted to OD 0.05 in fresh YPD media for treatment with 200  
528 µM farnesol or same volume of methanol. Aliquots taken at each of the indicated time  
529 points, after an appropriate dilution (if needed) were plated on YPD agar (no farnesol).  
530 Colony number was counted after 40 hours incubation at 30°C.

531

### 532 **RT-qPCR**

533 RNA samples were prepared from collected frozen cell pellets and reverse-transcribed  
534 as described previously (61). qPCR was performed using ‘Relative Standard Curve’  
535 method (StepOne, Life Technologies). *ACT1* abundance measured by ZL712/ZL713  
536 was used as an internal reference to compare *CDR1* (ZL540/ZL541), *CDR2*  
537 (ZL542/ZL543), *RTA3* (ZL544/ZL545), orf19.320 (ZL951/ZL958),  
538 *IFD1*(ZL823/ZL824), *PDR16* (M2PT-1/M2PT-2), orf19.7042 (M2PT-23/M2PT-24),  
539 orf19.344 (M2PT-15/M2PT-16) or expression across strains and conditions.  
540 ZL540/ZL541, ZL1008/ZL1009 and ZL951/ZL958 were used as respective  
541 pan-primers to compare expression and induction of *CDR1*, *CDR2* and orf19.320  
542 homologs in *C. albicans* and *C. dubliniensis*.

543

## 544 **Immunoblotting**

545 Immunoblot analysis was used to compare Cdr1-3HA expression, or 6His3Flag-Tac1  
546 or Znc1-3HA gel mobility. Cell lysates were prepared, resolved by SDS-PAGE and  
547 probed by an  $\alpha$ -HA (Roche, 3F10) or  $\alpha$ -Flag (Sigma, F7425) antibody as described  
548 (31). A lower molecular weight region of a gel, which typically did not contain the  
549 immunoblotting signals of interest in this study, was stained by Coomassie Blue as  
550 the loading reference.

551

## 552 **Chromatin Immuno-Precipitation (ChIP)**

553 ChIP experiments were performed as described previously (31) to analyze  
554 6His3Flag-Tac1, Znc1-3HA and Mediator (Med17-3HA) occupancy at target  
555 promoters. Results of ChIP experiments are presented in a ‘Relative Recovery of  
556 Input’ form. The absolute recovery at the *CDRI* promoter ‘1-up’ region in a  
557 non-farnesol treated untagged strain (as specified in figure legends) was set to ‘1’ to  
558 normalize recoveries at other promoter regions across conditions. Primers used in the  
559 ChIP assay are listed in Table S4 with their probing region denoted.

560

## 561 **Liquid $\beta$ -galactosidase activity assays**

562 *C. albicans* one-hybrid strains was diluted from overnight culture, grown for 3 to 4  
563 hours in fresh YPD media and treated with fluphenazine (~25  $\mu$ M), farnesol (50  $\mu$ M),  
564 1-Dodecanol (50  $\mu$ M) or methanol for 1 hour or 3 hours before collection for

565  $\beta$ -galactosidase activity measurement by an SDS/Chloroform method (31, 63).  
566  $\beta$ -galactosidase activity in Miller units were calculated by the following simplified  
567 formula:  $1,000 \times A_{420} / (T \times C)$ , where  $A_{420}$  is the absorbance of the reaction product  
568 at 420 nm, T is the reaction time in minutes, C is the total amounts of cells in total  
569 OD<sub>600</sub> used in the reaction.  $A_{420}$  and OD<sub>600</sub> values were measured with a Beckman  
570 Coulter DU-7300 spectrophotometer. Activity of each LexA fusion protein was tested  
571 in at least three confirmed transformants.

572

### 573 **Acknowledgments**

574 This study is supported by NIH 5R21AI113390 and 5R21AI115253 to LCM. We  
575 thank Dr. Deborah Hogan and the Hogan lab for sharing their expertise and reagents  
576 relating to farnesol biology. We also thank Dr. Gary Moran for providing strains.

577

578

### 579 **References:**

580

- 581 1. Pfaller MA, Diekema DJ. 2010. Epidemiology of invasive mycoses in North  
582 America. *Crit Rev Microbiol* 36:1-53.
- 583 2. Martins N, Ferreira IC, Barros L, Silva S, Henriques M. 2014. Candidiasis:  
584 predisposing factors, prevention, diagnosis and alternative treatment.  
585 *Mycopathologia* 177:223-40.
- 586 3. Antinori S, Milazzo L, Sollima S, Galli M, Corbellino M. 2016. Candidemia

- 587 and invasive candidiasis in adults: A narrative review. *Eur J Intern Med*  
588 34:21-28.
- 589 4. Martin R, Albrecht-Eckardt D, Brunke S, Hube B, Hunniger K, Kurzai O.  
590 2013. A core filamentation response network in *Candida albicans* is restricted  
591 to eight genes. *PLoS One* 8:e58613.
- 592 5. Sudbery PE. 2011. Growth of *Candida albicans* hyphae. *Nat Rev Microbiol*  
593 9:737-48.
- 594 6. Nobile CJ, Johnson AD. 2015. *Candida albicans* Biofilms and Human Disease.  
595 *Annu Rev Microbiol* 69:71-92.
- 596 7. Lindsay AK, Hogan DA. 2014. *Candida albicans*: Molecular interactions with  
597 *Pseudomonas aeruginosa* and *Staphylococcus aureus*. *Fungal Biology Reviews*  
598 28:85-96.
- 599 8. Dantas Ada S, Day A, Ikeh M, Kos I, Achan B, Quinn J. 2015. Oxidative  
600 stress responses in the human fungal pathogen, *Candida albicans*.  
601 *Biomolecules* 5:142-65.
- 602 9. Hornby JM, Jensen EC, Lisek AD, Tasto JJ, Jahnke B, Shoemaker R, Dussault  
603 P, Nickerson KW. 2001. Quorum sensing in the dimorphic fungus *Candida*  
604 *albicans* is mediated by farnesol. *Appl Environ Microbiol* 67:2982-92.
- 605 10. Ramage G, Saville SP, Wickes BL, Lopez-Ribot JL. 2002. Inhibition of  
606 *Candida albicans* biofilm formation by farnesol, a quorum-sensing molecule.  
607 *Appl Environ Microbiol* 68:5459-63.
- 608 11. Uppuluri P, Chaturvedi AK, Srinivasan A, Banerjee M, Ramasubramaniam

- 609 AK, Kohler JR, Kadosh D, Lopez-Ribot JL. 2010. Dispersion as an important  
610 step in the *Candida albicans* biofilm developmental cycle. *PLoS Pathog*  
611 6:e1000828.
- 612 12. Deveau A, Piispanen AE, Jackson AA, Hogan DA. 2010. Farnesol induces  
613 hydrogen peroxide resistance in *Candida albicans* yeast by inhibiting the  
614 Ras-cyclic AMP signaling pathway. *Eukaryot Cell* 9:569-77.
- 615 13. Nickerson KW, Atkin AL. 2017. Deciphering fungal dimorphism: Farnesol's  
616 unanswered questions. *Mol Microbiol* 103:567-575.
- 617 14. Albuquerque P, Casadevall A. 2012. Quorum sensing in fungi--a review. *Med*  
618 *Mycol* 50:337-45.
- 619 15. Weber K, Schulz B, Ruhnke M. 2010. The quorum-sensing molecule  
620 E,E-farnesol--its variable secretion and its impact on the growth and  
621 metabolism of *Candida* species. *Yeast* 27:727-39.
- 622 16. Weber K, Sohr R, Schulz B, Fleischhacker M, Ruhnke M. 2008. Secretion of  
623 E,E-farnesol and biofilm formation in eight different *Candida* species.  
624 *Antimicrob Agents Chemother* 52:1859-61.
- 625 17. Davis-Hanna A, Piispanen AE, Stateva LI, Hogan DA. 2008. Farnesol and  
626 dodecanol effects on the *Candida albicans* Ras1-cAMP signalling pathway and  
627 the regulation of morphogenesis. *Mol Microbiol* 67:47-62.
- 628 18. Hall RA, Turner KJ, Chaloupka J, Cottier F, De Sordi L, Sanglard D, Levin  
629 LR, Buck J, Muhlschlegel FA. 2011. The quorum-sensing molecules  
630 farnesol/homoserine lactone and dodecanol operate via distinct modes of

- 631 action in *Candida albicans*. *Eukaryot Cell* 10:1034-42.
- 632 19. Lindsay AK, Deveau A, Piispanen AE, Hogan DA. 2012. Farnesol and cyclic  
633 AMP signaling effects on the hypha-to-yeast transition in *Candida albicans*.  
634 *Eukaryot Cell* 11:1219-25.
- 635 20. Cao YY, Cao YB, Xu Z, Ying K, Li Y, Xie Y, Zhu ZY, Chen WS, Jiang YY.  
636 2005. cDNA microarray analysis of differential gene expression in *Candida*  
637 *albicans* biofilm exposed to farnesol. *Antimicrob Agents Chemother* 49:584-9.
- 638 21. Schmidt M, Barker S, Essmann M, Larsen B. 2008. Effect of commonly used  
639 herbicides on the virulence factor CDR1 in *Candida albicans*. *Environ Toxicol*  
640 *Chem* 27:2346-51.
- 641 22. Zhu J, Krom BP, Sanglard D, Intapa C, Dawson CC, Peters BM, Shirtliff ME,  
642 Jabra-Rizk MA. 2011. Farnesol-induced apoptosis in *Candida albicans* is  
643 mediated by Cdr1-p extrusion and depletion of intracellular glutathione. *PLoS*  
644 *One* 6:e28830.
- 645 23. Uppuluri P, Mekala S, Chaffin WL. 2007. Farnesol-mediated inhibition of  
646 *Candida albicans* yeast growth and rescue by a diacylglycerol analogue. *Yeast*  
647 24:681-93.
- 648 24. Jabra-Rizk MA, Shirtliff M, James C, Meiller T. 2006. Effect of farnesol on  
649 *Candida dubliniensis* biofilm formation and fluconazole resistance. *FEMS*  
650 *Yeast Res* 6:1063-73.
- 651 25. Coste AT, Karababa M, Ischer F, Bille J, Sanglard D. 2004. TAC1,  
652 transcriptional activator of CDR genes, is a new transcription factor involved

- 653 in the regulation of *Candida albicans* ABC transporters CDR1 and CDR2.  
654 *Eukaryot Cell* 3:1639-52.
- 655 26. Coste AT, Crittin J, Bauser C, Rohde B, Sanglard D. 2009. Functional  
656 analysis of cis- and trans-acting elements of the *Candida albicans* CDR2  
657 promoter with a novel promoter reporter system. *Eukaryot Cell* 8:1250-67.
- 658 27. Sanglard D, Coste A, Ferrari S. 2009. Antifungal drug resistance mechanisms  
659 in fungal pathogens from the perspective of transcriptional gene regulation.  
660 *FEMS Yeast Res* 9:1029-50.
- 661 28. de Micheli M, Bille J, Schueller C, Sanglard D. 2002. A common  
662 drug-responsive element mediates the upregulation of the *Candida albicans*  
663 ABC transporters CDR1 and CDR2, two genes involved in antifungal drug  
664 resistance. *Mol Microbiol* 43:1197-214.
- 665 29. Schneider S, Morschhauser J. 2015. Induction of *Candida albicans* drug  
666 resistance genes by hybrid zinc cluster transcription factors. *Antimicrob*  
667 *Agents Chemother* 59:558-69.
- 668 30. Schillig R, Morschhauser J. 2013. Analysis of a fungus-specific transcription  
669 factor family, the *Candida albicans* zinc cluster proteins, by artificial  
670 activation. *Mol Microbiol* 89:1003-17.
- 671 31. Liu Z, Myers LC. 2017. Mediator Tail Module Is Required for Tac1-Activated  
672 CDR1 Expression and Azole Resistance in *Candida albicans*. *Antimicrob*  
673 *Agents Chemother* 61:pii: e01342-17.
- 674 32. Shchepin R, Hornby JM, Burger E, Niessen T, Dussault P, Nickerson KW.

- 675 2003. Quorum sensing in *Candida albicans*: probing farnesol's mode of action  
676 with 40 natural and synthetic farnesol analogs. *Chem Biol* 10:743-50.
- 677 33. Hogan DA, Vik A, Kolter R. 2004. A *Pseudomonas aeruginosa*  
678 quorum-sensing molecule influences *Candida albicans* morphology. *Mol*  
679 *Microbiol* 54:1212-23.
- 680 34. Chen H, Fujita M, Feng Q, Clardy J, Fink GR. 2004. Tyrosol is a  
681 quorum-sensing molecule in *Candida albicans*. *Proc Natl Acad Sci U S A*  
682 101:5048-52.
- 683 35. Chen H, Fink GR. 2006. Feedback control of morphogenesis in fungi by  
684 aromatic alcohols. *Genes Dev* 20:1150-61.
- 685 36. Liu TT, Znaidi S, Barker KS, Xu L, Homayouni R, Saidane S, Morschhauser J,  
686 Nantel A, Raymond M, Rogers PD. 2007. Genome-wide expression and  
687 location analyses of the *Candida albicans* Tac1p regulon. *Eukaryot Cell*  
688 6:2122-38.
- 689 37. Thakur JK, Arthanari H, Yang F, Pan SJ, Fan X, Breger J, Frueh DP, Gulshan  
690 K, Li DK, Mylonakis E, Struhl K, Moye-Rowley WS, Cormack BP, Wagner  
691 G, Naar AM. 2008. A nuclear receptor-like pathway regulating multidrug  
692 resistance in fungi. *Nature* 452:604-9.
- 693 38. Moran G, Sullivan D, Morschhauser J, Coleman D. 2002. The *Candida*  
694 *dubliniensis* CdCDR1 gene is not essential for fluconazole resistance.  
695 *Antimicrob Agents Chemother* 46:2829-41.
- 696 39. Shchepin R, Dumitru R, Nickerson KW, Lund M, Dussault PH. 2005.



- 697 Biologically active fluorescent farnesol analogs. *Chem Biol* 12:639-41.
- 698 40. Thakur JK, Arthanari H, Yang F, Chau KH, Wagner G, Naar AM. 2009.
- 699 Mediator subunit Gal11p/MED15 is required for fatty acid-dependent gene
- 700 activation by yeast transcription factor Oaf1p. *J Biol Chem* 284:4422-8.
- 701 41. Forman BM, Goode E, Chen J, Oro AE, Bradley DJ, Perlmann T, Noonan DJ,
- 702 Burka LT, McMorris T, Lamph WW, Evans RM, Weinberger C. 1995.
- 703 Identification of a nuclear receptor that is activated by farnesol metabolites.
- 704 *Cell* 81:687-93.
- 705 42. Makishima M, Okamoto AY, Repa JJ, Tu H, Learned RM, Luk A, Hull MV,
- 706 Lustig KD, Mangelsdorf DJ, Shan B. 1999. Identification of a nuclear receptor
- 707 for bile acids. *Science* 284:1362-5.
- 708 43. Parks DJ, Blanchard SG, Bledsoe RK, Chandra G, Consler TG, Kliewer SA,
- 709 Stimmel JB, Willson TM, Zavacki AM, Moore DD, Lehmann JM. 1999. Bile
- 710 acids: natural ligands for an orphan nuclear receptor. *Science* 284:1365-8.
- 711 44. Mamnun YM, Pandjaitan R, Mahe Y, Delahodde A, Kuchler K. 2002. The
- 712 yeast zinc finger regulators Pdr1p and Pdr3p control pleiotropic drug
- 713 resistance (PDR) as homo- and heterodimers in vivo. *Mol Microbiol*
- 714 46:1429-40.
- 715 45. Trzcinska-Danielewicz J, Ishikawa T, Micialkiewicz A, Fronk J. 2008. Yeast
- 716 transcription factor Oaf1 forms homodimer and induces some
- 717 oleate-responsive genes in absence of Pip2. *Biochem Biophys Res Commun*
- 718 374:763-6.

- 719 46. Rottensteiner H, Kal AJ, Hamilton B, Ruis H, Tabak HF. 1997. A heterodimer  
720 of the Zn<sub>2</sub>Cys<sub>6</sub> transcription factors Pip2p and Oaf1p controls induction of  
721 genes encoding peroxisomal proteins in *Saccharomyces cerevisiae*. *Eur J*  
722 *Biochem* 247:776-83.
- 723 47. Cahuzac B, Cerdan R, Felenbok B, Guittet E. 2001. The solution structure of  
724 an AlcR-DNA complex sheds light onto the unique tight and monomeric DNA  
725 binding of a Zn(2)Cys(6) protein. *Structure* 9:827-36.
- 726 48. Reece RJ, Ptashne M. 1993. Determinants of binding-site specificity among  
727 yeast C6 zinc cluster proteins. *Science* 261:909-11.
- 728 49. Mamane Y, Hellauer K, Rochon MH, Turcotte B. 1998. A linker region of the  
729 yeast zinc cluster protein leu3p specifies binding to everted repeat DNA. *J*  
730 *Biol Chem* 273:18556-61.
- 731 50. Johnston M, Dover J. 1987. Mutations that inactivate a yeast transcriptional  
732 regulatory protein cluster in an evolutionarily conserved DNA binding domain.  
733 *Proc Natl Acad Sci U S A* 84:2401-5.
- 734 51. Coste A, Turner V, Ischer F, Morschhauser J, Forche A, Selmecki A, Berman  
735 J, Bille J, Sanglard D. 2006. A mutation in Tac1p, a transcription factor  
736 regulating CDR1 and CDR2, is coupled with loss of heterozygosity at  
737 chromosome 5 to mediate antifungal resistance in *Candida albicans*. *Genetics*  
738 172:2139-56.
- 739 52. Wang Y, Liu JY, Shi C, Li WJ, Zhao Y, Yan L, Xiang MJ. 2015. Mutations in  
740 transcription factor Mrr2p contribute to fluconazole resistance in clinical

- 741 isolates of *Candida albicans*. *Int J Antimicrob Agents* 46:552-9.
- 742 53. Hala G, Rachel G, Arthur B, Oceane V, Anne-Laure B, Jean-Michel C,  
743 Françoise A. 2014. Changes in glutathione-dependent redox status and  
744 mitochondrial energetic strategies are part of the adaptive response during the  
745 filamentation process in *Candida albicans*. *Free Radic Biol Med* 75 Suppl  
746 1:S22.
- 747 54. Langford ML, Hasim S, Nickerson KW, Atkin AL. 2010. Activity and toxicity  
748 of farnesol towards *Candida albicans* are dependent on growth conditions.  
749 *Antimicrob Agents Chemother* 54:940-2.
- 750 55. Polke M, Sprenger M, Scherlach K, Alban-Proano MC, Martin R, Hertweck C,  
751 Hube B, Jacobsen ID. 2017. A functional link between hyphal maintenance  
752 and quorum sensing in *Candida albicans*. *Mol Microbiol* 103:595-617.
- 753 56. Szczepaniak J, Lukaszewicz M, Krasowska A. 2015. Detection of inhibitors of  
754 *Candida albicans* Cdr transporters using a diS-C3(3) fluorescence. *Front*  
755 *Microbiol* 6:176.
- 756 57. Wada S, Niimi M, Niimi K, Holmes AR, Monk BC, Cannon RD, Uehara Y.  
757 2002. *Candida glabrata* ATP-binding cassette transporters Cdr1p and Pdh1p  
758 expressed in a *Saccharomyces cerevisiae* strain deficient in membrane  
759 transporters show phosphorylation-dependent pumping properties. *J Biol*  
760 *Chem* 277:46809-21.
- 761 58. Ramage G, Bachmann S, Patterson TF, Wickes BL, Lopez-Ribot JL. 2002.  
762 Investigation of multidrug efflux pumps in relation to fluconazole resistance in

- 763 Candida albicans biofilms. *J Antimicrob Chemother* 49:973-80.
- 764 59. Nett JE, Lepak AJ, Marchillo K, Andes DR. 2009. Time course global gene  
765 expression analysis of an in vivo *Candida* biofilm. *J Infect Dis* 200:307-13.
- 766 60. Mukherjee PK, Chandra J, Kuhn DM, Ghannoum MA. 2003. Mechanism of  
767 fluconazole resistance in *Candida albicans* biofilms: phase-specific role of  
768 efflux pumps and membrane sterols. *Infect Immun* 71:4333-40.
- 769 61. Zhang A, Liu Z, Myers LC. 2013. Differential regulation of white-opaque  
770 switching by individual subunits of *Candida albicans* mediator. *Eukaryot Cell*  
771 12:1293-304.
- 772 62. Geissmann Q. 2013. OpenCFU, a new free and open-source software to count  
773 cell colonies and other circular objects. *PLoS One* 8:e54072.
- 774 63. Guarente L. 1983. Yeast promoters and lacZ fusions designed to study  
775 expression of cloned genes in yeast. *Methods Enzymol* 101:181-91.

776

777

778 **Table 1 Relative colony radius of *C. albicans* strains grown on farnesol containing YPD agar**

779

| Strain <sup>a</sup>                                               | [FOH] (μM) | Vehicle           | 25  | 50  | 100 | 200 |
|-------------------------------------------------------------------|------------|-------------------|-----|-----|-----|-----|
| Wild Type                                                         |            | ++++ <sup>b</sup> | +++ | +++ | +++ | +++ |
| <i>cdr1<sup>Δ/Δ</sup></i>                                         |            | ++++              | +++ | +   | NG  | NG  |
| <i>cdr2<sup>Δ/Δ</sup></i>                                         |            | ++++              | +++ | +++ | +++ | +++ |
| <i>cdr1<sup>Δ/Δ</sup> cdr2<sup>Δ/Δ</sup></i>                      |            | ++++              | ++  | NG  | NG  | NG  |
| <i>tac1<sup>Δ/Δ</sup></i>                                         |            | ++++              | +++ | +++ | +++ | +++ |
| <i>tac1<sup>Δ/Δ</sup> cdr1<sup>Δ/Δ</sup></i>                      |            | ++++              | +++ | NG  | NG  | NG  |
| <i>znc1<sup>Δ/Δ</sup></i>                                         |            | ++++              | +++ | +++ | +++ | +++ |
| <i>znc1<sup>Δ/Δ</sup> cdr1<sup>Δ/Δ</sup></i>                      |            | ++++              | +++ | +   | NG  | NG  |
| <i>tac1<sup>Δ/Δ</sup> znc1<sup>Δ/Δ</sup></i>                      |            | ++++              | +++ | +++ | +++ | +++ |
| <i>tac1<sup>Δ/Δ</sup> znc1<sup>Δ/Δ</sup> cdr1<sup>Δ/Δ</sup></i>   |            | ++++              | +++ | NG  | NG  | NG  |
| <i>mrr2<sup>Δ/Δ</sup></i>                                         |            | ++++              | +++ | +++ | +++ | +++ |
| <i>tac1<sup>Δ/Δ</sup> znc1<sup>Δ/Δ</sup> mrr2<sup>Δ/Δ</sup></i>   |            | ++++              | +++ | +++ | ++  | ++  |
| <i>TAC1<sup>WT</sup></i>                                          |            | ++++              | +++ | +++ | +++ | +++ |
| <i>TAC1<sup>WT</sup> cdr1<sup>Δ/Δ</sup></i>                       |            | ++++              | +++ | ++  | NG  | NG  |
| <i>TAC1<sup>WT</sup> cdr1<sup>Δ/Δ</sup> cdr2<sup>Δ/Δ</sup></i>    |            | ++++              | +++ | NG  | NG  | NG  |
| <i>TAC1<sup>A736V</sup></i>                                       |            | ++++              | +++ | +++ | +++ | +++ |
| <i>TAC1<sup>A736V</sup> cdr1<sup>Δ/Δ</sup></i>                    |            | ++++              | +++ | +++ | +++ | +++ |
| <i>TAC1<sup>A736V</sup> cdr1<sup>Δ/Δ</sup> cdr2<sup>Δ/Δ</sup></i> |            | ++++              | +++ | NG  | NG  | NG  |
| <i>TAC1<sup>N977D</sup></i>                                       |            | ++++              | +++ | +++ | +++ | +++ |
| <i>TAC1<sup>N977D</sup> cdr1<sup>Δ/Δ</sup></i>                    |            | ++++              | +++ | +++ | +++ | +++ |
| <i>TAC1<sup>N977D</sup> cdr1<sup>Δ/Δ</sup> cdr2<sup>Δ/Δ</sup></i> |            | ++++              | +++ | NG  | NG  | NG  |

780 <sup>a</sup> Strains tested in this table are marked by their genotypic feature in Table S2. Strains (and their  
781 growth data) are divided (horizontal line) with respect to their parental wild type background ('wild  
782 type' or '*TAC1<sup>WT</sup>*').

783 <sup>b</sup> Each entry in the table represents the colony size observed for a particular combination of strain and  
784 treatment. The average radius of colonies formed by a wild type reference strain ('wild type' or  
785 '*TAC1<sup>WT</sup>*') on non-FOH containing plates ('Vehicle') was set to 100 to normalize colony size of its  
786 derivative mutants under each growth condition. Data were symbolized by the following  
787 transformation: 90-110 ('++++'); 70-90 ('+++'); 50-70 ('++'); 30-50('+'); no visible colony  
788 formation after 40 hours incubation at 30°C ('NG').

789

790 **Table 2** Relative colony radius of *C. dubliniensis* strains grown on farnesol containing YPD agar

791

| Strain <sup>a</sup>                                                           | [FOH] (μM) | Vehicle           | 25  | 50  | 100 | 200 |
|-------------------------------------------------------------------------------|------------|-------------------|-----|-----|-----|-----|
| <b>CD36 (I; <i>cdr1</i><sup>756stop</sup>/<i>cdr1</i><sup>756stop</sup>)</b>  |            | ++++ <sup>b</sup> | +++ | ++  | NG  | NG  |
| <b>CD38 (I; <i>cdr1</i><sup>756stop</sup>/<i>cdr1</i><sup>756stop</sup>)</b>  |            | ++++              | ++  | +   | NG  | NG  |
| <b>Wü284 (I; <i>cdr1</i><sup>756stop</sup>/<i>cdr1</i><sup>756stop</sup>)</b> |            | ++++              | ++  | NG  | NG  | NG  |
| Wü284 <i>cdr1</i> <sup>Δ/Δ</sup>                                              |            | ++++              | ++  | NG  | NG  | NG  |
| <b>CD57 (I; <i>CDRI/CDRI</i>)</b>                                             |            | ++++              | +++ | +++ | +++ | +++ |
| CD57 <i>cdr1</i> <sup>Δ/Δ</sup>                                               |            | ++++              | ++  | ++  | ++  | ++  |
| CD57 <i>tac1</i> <sup>Δ/Δ</sup>                                               |            | ++++              | +++ | +++ | +++ | +++ |
| CD57 <i>tac1</i> <sup>Δ/Δ</sup> <i>znc1</i> <sup>Δ/Δ</sup>                    |            | ++++              | +++ | +++ | +++ | +++ |
| <b>CM1 (I; <i>CDRI/CDRI</i>)</b>                                              |            | ++++              | +++ | +++ | +++ | +++ |
| <b>CBS8500 (I; <i>CDRI/CDRI</i>)</b>                                          |            | ++++              | +++ | +++ | +++ | +++ |
| <b>CD506 (II; <i>CDRI/CDRI</i>)</b>                                           |            | ++++              | ++  | ++  | ++  | +++ |
| <b>CAN6 (II; <i>CDRI/CDRI</i>)</b>                                            |            | ++++              | +++ | +++ | +++ | +++ |
| <b>p7718 (IV; <i>CDRI/CDRI</i>)</b>                                           |            | ++++              | +++ | +++ | +++ | +++ |

792<sup>a</sup> The genotype group ('I'; 'II'; 'IV') of each *C. dubliniensis* isolate and the presence or absence of the

793 *cdr1*<sup>756stop</sup> allele are denoted in the parentheses. The genotype of each mutant tested in this table is

794 described in detail in Table S2.

795<sup>b</sup> The average radius of colonies formed by each wild type *C. dubliniensis* isolate on non-FOH containing

796 plates ('Vehicle') was set to "100%" to normalize its colony size or its derivative mutants colony size

797 under each growth condition. Data were symbolized by the following transformation: 90-110 ('++++');

798 70-90 ('+++'); 50-70 ('++'); 30-50 ('+'); No growth (NG) suggests no visible colonies were formed after

799 48 hours incubation at 30°C.

800

801

802

803

804 **Fig. 1**

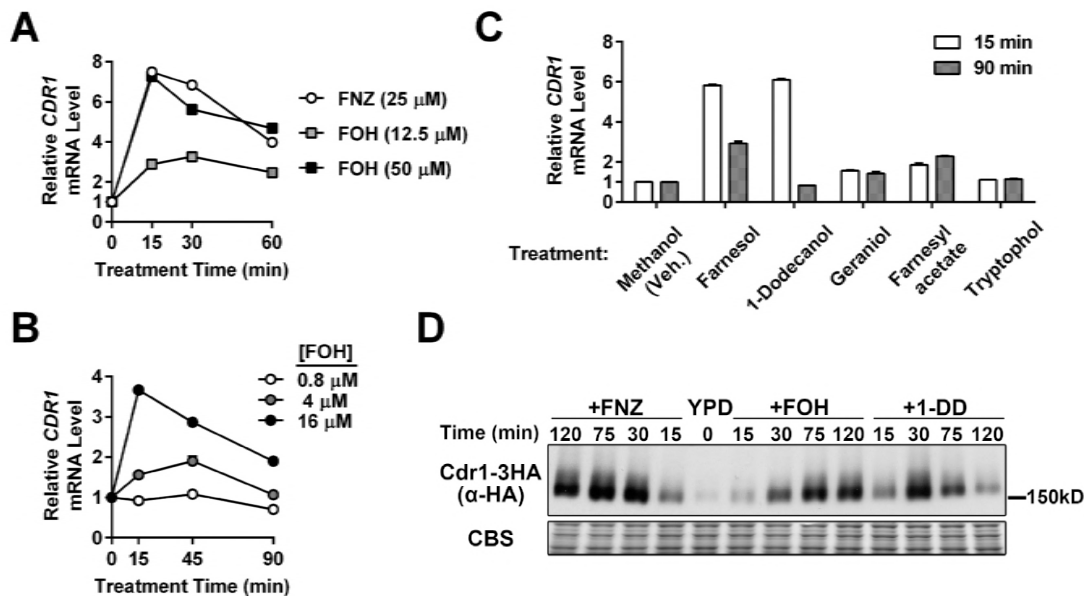

805

806

807 **Fig. 1 CDR1 induction by farnesol and 1-dodecanol treatment**

808 (A) RT-qPCR analysis of *CDR1* mRNA expression in a *C. albicans* wild type strain (yLM167) grown in  
809 YPD and treated with farnesol (FOH) or fluphenazine (FNZ). *CDR1* basal expression (mRNA level  
810 prior to treatment; ‘0 min’) was set to ‘1’ to calculate the relative *CDR1* level across conditions. *ACT1*  
811 level was used as an internal reference. Results from one representative experiment were presented by  
812 the mean and standard deviation (value may not be large enough to give a visible error bar) of two qPCR  
813 measurements on the same set of cDNA samples. (B) RT-qPCR analysis of *CDR1* mRNA expression  
814 induced by increasing concentrations of FOH. *CDR1* expression, in the absence of treatment, in the  
815 tested strain (yLM167) was set to ‘1’. (C) RT-qPCR analysis of changes in *CDR1* expression upon  
816 exposure to molecules structurally or functionally related to FOH. Each compound tested (or an equal  
817 volume of methanol (Vehicle)) was added into log phase cultures of a wild type strain (yLM167) at a  
818 final concentration of 50  $\mu$ M. *CDR1* mRNA level in the methanol treated samples (15 min) was set to  
819 ‘1’. (D) Immunoblot analysis of whole cell extracts made from a strain expressing C-terminally 3XHA

820 tagged Cdr1 (yLM505) treated with FNZ (25  $\mu$ M), FOH (50  $\mu$ M) or 1-DD (50  $\mu$ M) for the indicated  
821 amount of time. Extracts were resolved on a 6% SDS-PAGE gel, and probed by an  $\alpha$ -HA antibody or  
822 stained by Coomassie Blue (CBS) as a loading control.



823 **Fig. 2**

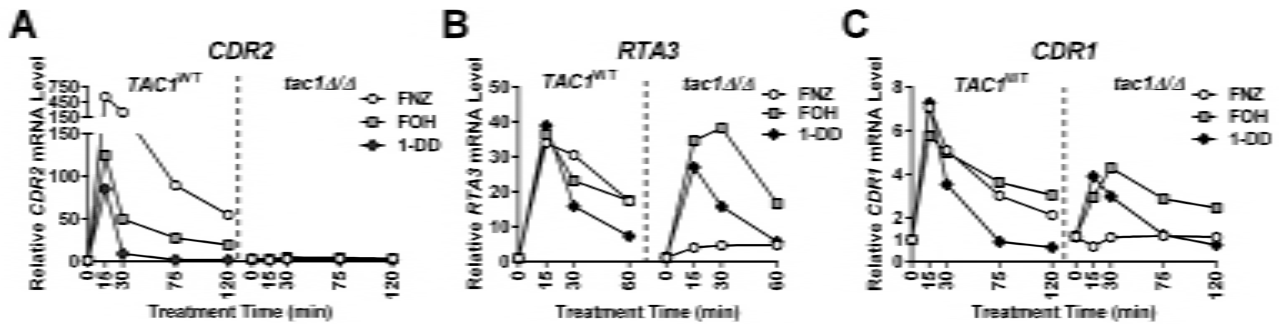

824

825

826 **Fig. 2 *TAC1* dependence of *CDR2*, *RTA3* and *CDR1* induction by FOH and 1-DD.**

827 RT-qPCR analysis of *CDR2* (A), *RTA3* (B) and *CDR1* (C) mRNA expression after treatment with FNZ  
828 (25  $\mu$ M), FOH (50  $\mu$ M) and 1-DD (50  $\mu$ M) in a wild type (*TAC1*<sup>WT</sup>; yLM167 or yLM660) and a *tac1*  
829 deletion strain (*tac1Δ/Δ*; yLM166 or yLM663). The expression level of each gene, in the absence of  
830 treatment ('0' min) in the wild type background was set to '1'.

831

832

833

834 **Fig. 3**

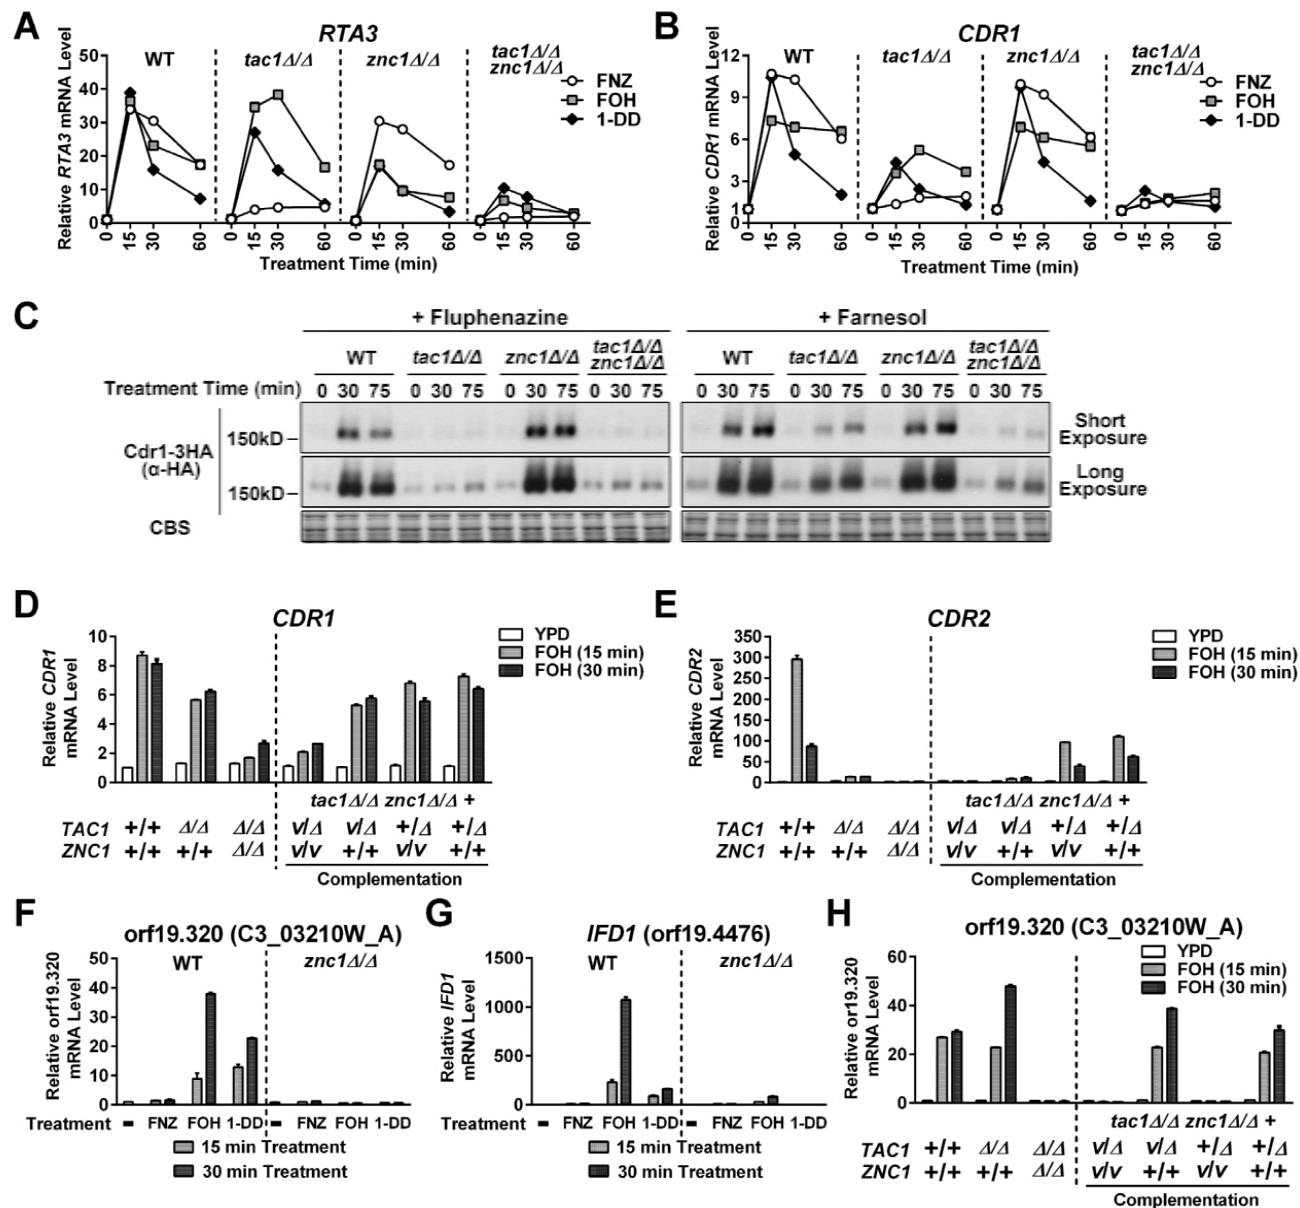

835

836

837 **Fig. 3 Znc1 and Tac1 contribute individually and in tandem to the regulation of specific FOH and**

838 **1-DD induced promoters.**

839 **(A-B)** RT-qPCR analysis of *RTA3* **(A)** and *CDR1* **(B)** mRNA expression in *tac1Δ/Δ* and *znc1Δ/Δ* strains

840 treated with FNZ, FOH or 1-DD. A wild type strain (yLM660) and mutants carrying a *tac1* deletion

841 (yLM663), *znc1* deletion (yLM661) or double deletion (yLM664) were treated with FNZ (25 μM), FOH

842 (50  $\mu$ M) or 1-DD (50  $\mu$ M). *CDR1* and *RTA3* basal expression in the untreated wild type strain (yLM660)  
843 was individually set to '1'. **(C)** Immunoblot analysis of Cdr1 protein levels in *tac1 $\Delta/\Delta$* , *znc1 $\Delta/\Delta$*  and  
844 double deletion strains treated with FNZ or FOH. Wild type (yLM665), *tac1 $\Delta/\Delta$*  (yLM666), *znc1 $\Delta/\Delta$*   
845 (yLM667) or *tac1 $\Delta/\Delta$  znc1 $\Delta/\Delta$*  (yLM668) strains expressing C-terminally 3XHA tagged Cdr1 were  
846 treated with FNZ (25 $\mu$ M) or FOH (50  $\mu$ M). Cell lysates were resolved on 6% SDS-PAGE gels and  
847 probed with an anti-HA antibody. Blot images, acquired at two exposure times, are presented, and  
848 Coomassie Blue staining (CBS) images are presented as a loading control. **(D-E)** RT-qPCR analysis of  
849 *CDR1* **(D)** and *CDR2* **(E)** mRNA expression in *tac1 $\Delta/\Delta$*  and *znc1 $\Delta/\Delta$*  strains, and complementation  
850 controls, treated with FOH. A *tac1 $\Delta/\Delta$  znc1 $\Delta/\Delta$*  strain was complemented by *ZNC1* (yLM676), *TAC1*  
851 (yLM677), or both (yLM675) and treated with FOH (50  $\mu$ M). Parallel experiments were also conducted  
852 in a wild type (yLM660), a *tac1* deletion (yLM663), the parental *tac1 znc1* double deletion (yLM664)  
853 and a mock complementation (yLM678) strains for comparison. '+' labels a native or restored gene  
854 locus, while ' $\Delta$ ' and '*V*' (vector) mark an unrestored gene disruption and a mock complementation by  
855 introducing an empty vector. **(F)** and **(G)** RT-qPCR analysis of orf19.320 **(F)** and *IFD1* **(G)** mRNA  
856 expression in the wild type *ZNC1* or *znc1* deletion background (yLM660 and yLM661 respectively)  
857 treated with FNZ (25 $\mu$ M), FOH (50  $\mu$ M) and 1-DD (50  $\mu$ M) for the indicated period of time. orf19.320  
858 and *IFD1* basal expression in the wild type strain was individually set to '1'. **(H)** qPCR analysis of  
859 orf19.320 expression in the complementation strains using cDNA samples tested in **(D)** and **(E)**.  
860 Non-induced expression levels in the wild type strain (yLM660) were set to '1'.

861 **Fig. 4**

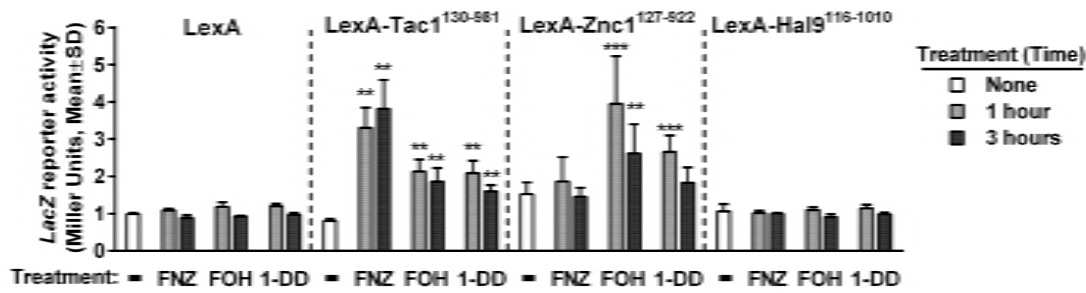

862

863

864 **Fig. 4 Direct hyperactivation of Tac1 and Znc1 by FOH and 1-DD**

865 *C. albicans* one hybrid assay assessing Tac1- and Znc1-dependent reporter activation under multiple  
866 inducing conditions. A *C. albicans* one hybrid strain expressing the LexA DNA binding domain  
867 (yLM567) or the fusion of the LexA DBD with Tac1, Znc1 or Hal9 fragments (yLM568, yLM680 and  
868 yLM681, respectively) were treated with FNZ (25  $\mu$ M), FOH (50  $\mu$ M) and 1-DD (50  $\mu$ M) for 1 hour and  
869 3 hours before measurement of LacZ activity. Untreated ('none') and methanol treated (not shown)  
870 cultures showed the same level of basal activity. Statistical significance for reporter activation was  
871 determined by comparing the basal and induced LacZ activity in t-tests (\*\*: p<0.01; \*\*\*: p<0.001).

872

873

874 **Fig. 5**

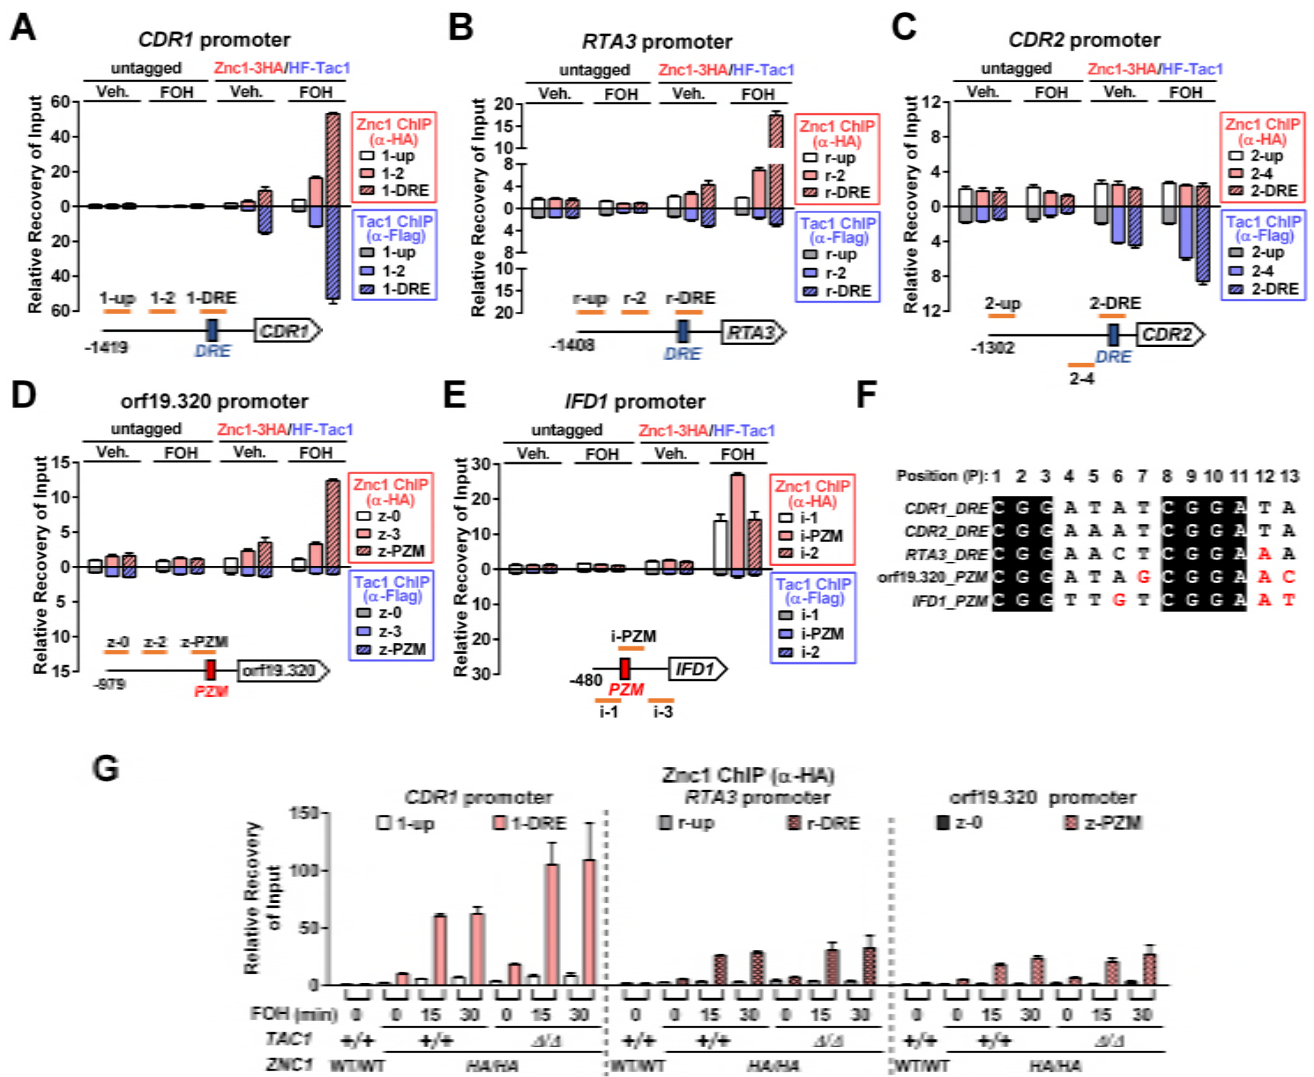

875

876

877 **Fig. 5 Tac1 and Znc1 occupancy at FOH target promoters**

878 (A-E) ChIP analysis of Tac1 and Znc1 occupancy at the *CDR1* (A), *RTA3* (B), *CDR2* (C), *orf19.320* (D)

879 and *IFD1* (E) upon treatment with FOH. A strain carrying two copies of N-terminally 6His3Flag-tagged

880 *TAC1* and two copies of C-terminally 3XHA tagged *ZNC1* ('Znc1-3HA/HF-Tac1'; yLM686) and a

881 strain with native *TAC1* and *ZNC1* ('untagged'; yLM660) were treated with FOH (50 μM) or vehicle

882 ('Veh. '; methanol) for 15 minutes before fixation. Each sample was immunoprecipitated by an anti-Flag

883 antibody and an anti-HA antibody in separate reactions. Promoter regions tested for Tac1 and Znc1  
884 binding and their relative positions to the known Tac1 *cis* elements at the *CDR1*, *RTA3* and *CDR2*  
885 promoters (Drug-responsive Elements ('DRE'); blue boxes) or the CGG triplet motifs found at the  
886 orf19.320 and *IFDI* promoters (potential Znc1 binding motifs ('PZM'); red boxes) are schematically  
887 shown in each panel. Percent recovery of input (Input%) at the *CDR1* promoter '1-up' region in the  
888 anti-Flag/anti-HA ChIP products obtained from the methanol-treated untagged strain was set to '1' to  
889 normalize Tac1/Znc1 binding across conditions and promoter regions. Hence, the strength of ChIP  
890 signals (Y axis value) can be compared across panels. **(F)** Alignment of the *CDR1*, *CDR2* and *RTA3*  
891 DREs and the CGG triplet motifs (PZMs) at the orf19.320 and *IFDI* promoters. The thirteen nucleotide  
892 positions are numbered in order. Individual nucleotide substitutions that have been found to be  
893 deleterious in the *CDR2* DRE (26) are highlighted in red. **(G)** ChIP analysis of Znc1 occupancy at target  
894 promoters in a *tac1* deletion background. Wild type (yLM684) and *tac1* deletion (yLM685) strains  
895 expressing two copies of C-terminally 3XHA tagged *ZNC1* ('HA/HA') were treated with 50  $\mu$ M FOH  
896 for the indicated period time before fixation for an anti-HA ChIP assay. Percent recovery of input  
897 (Input%) at the '1-up' region in a wild type strain with native Tac1 ('+/+') and Znc1 ('WT/WT') was set  
898 to '1' to normalize recoveries across conditions and promoters.

899 **Fig. 6**

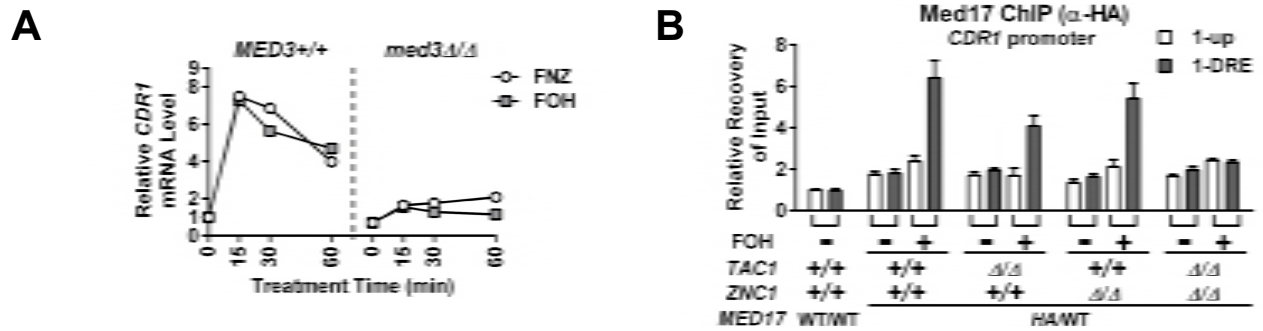

900

901

902 **Fig. 6 Mediator requirement for, and recruitment by, Tac1 and Znc1 dependent induction of**  
 903 ***CDR1* by farnesol**

904 **(A)** RT-qPCR analysis of *CDR1* mRNA expression in a wild type strain (yLM167) and a *med3* null  
 905 strain (yLM232) after treatment with 50  $\mu$ M FOH. FNZ (25  $\mu$ M) induction (31) was performed as a  
 906 reference. **(B)** Anti-HA ChIP analysis of Mediator occupancy at the *CDR1* promoter in wild type  
 907 (yLM695), *tac1* $\Delta/\Delta$  (yLM696), *znc1* $\Delta/\Delta$  (yLM697), and *tac1* $\Delta/\Delta$  *znc1* $\Delta/\Delta$  (yLM698) strains expressing  
 908 C-terminally 3XHA tagged Med17 treated with 50  $\mu$ M FOH. Percent recovery of input (Input%) at the  
 909 ‘1-up’ region in a ChIP product obtained from a strain with native *MED17* (‘WT/WT’; yLM660) was set  
 910 to ‘1’.

911 **Fig. 7**

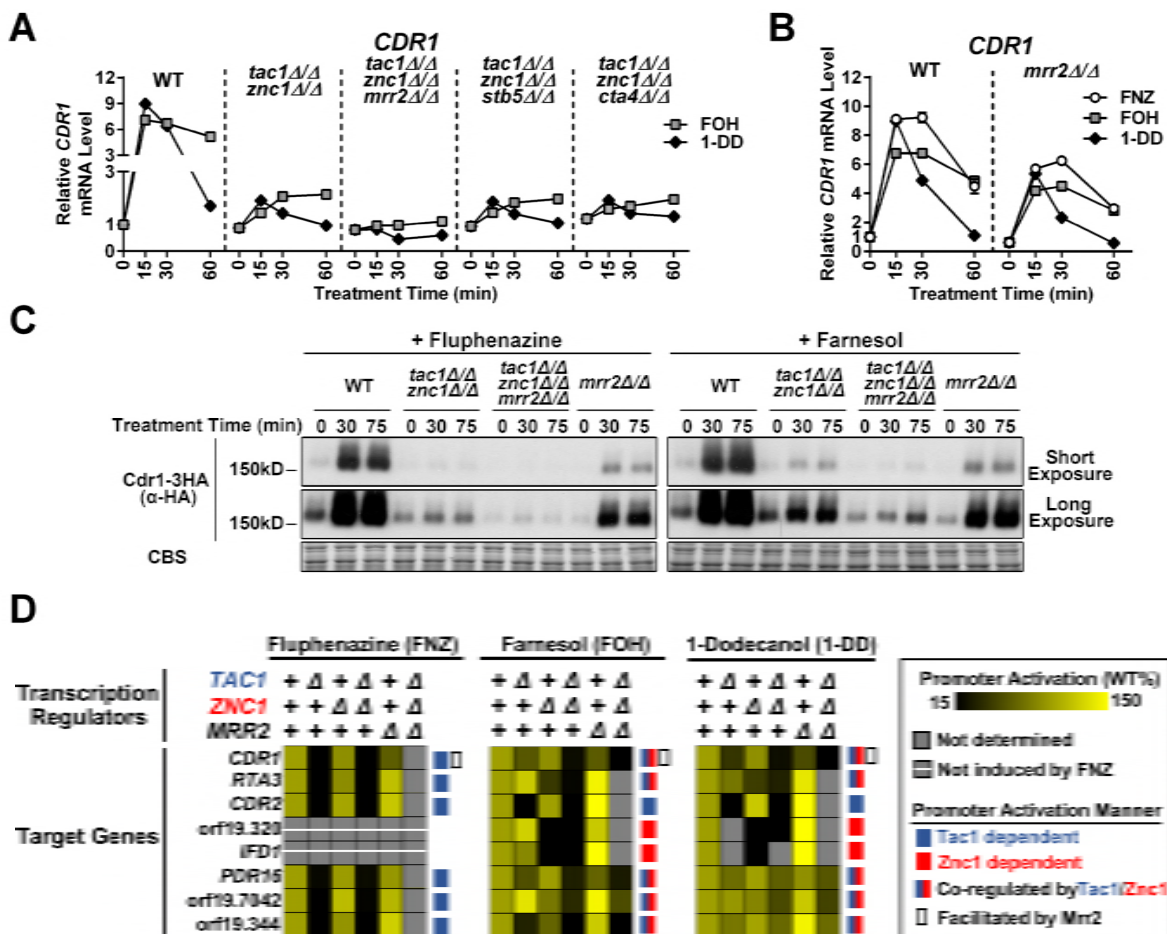

912

913

914 **Fig. 7 Influence of Mrr2 on FOH and 1-DD target gene expression**

915 (A) RT-qPCR analysis of *CDR1* mRNA expression in a wild type strain (yLM660), and *tac1Δ/Δ*  
 916 *znc1Δ/Δ* strains (yLM701-yLM704) generated from an otherwise wild type, *mrr2Δ/Δ*, *stb5Δ/Δ* or  
 917 *cta4Δ/Δ* background, and treated with FOH (50 μM) and 1-DD (50 μM). *CDR1* expression, in the  
 918 absence of treatment, in yLM660 was set to '1'. (B) RT-qPCR analysis of *CDR1* mRNA expression in a  
 919 wild type (yLM660) and *mrr2* null (yLM662) strains treated with FNZ (25 μM), FOH (50 μM) or 1-DD  
 920 (50 μM). *CDR1* expression level, in the absence of treatment, in the wild type strain was set to '1'. (C)  
 921 Anti-HA immunoblot analysis of C-terminally 3XHA tagged *CDR1* protein expression in *MRR2* wild



922 type strains (yLM665 and yLM705) and deletion mutants (yLM707 and yLM706) in the presence and  
923 absence of *TAC1* and *ZNC1*, and treatment with FNZ (25  $\mu$ M) or FOH (50  $\mu$ M). Blot images acquired  
924 at different exposures are presented with a Coomassie Blue staining (CBS) as loading control. **(D)** A  
925 summary of the effect of *TAC1*, *ZNC1* and *MRR2* on gene expression induced by FNZ (25  $\mu$ M), FOH  
926 (50  $\mu$ M) and 1-DD (50  $\mu$ M). The mean of the relative gene expression after 15 and 30 minutes exposure  
927 to the inducer was used to compare promoter activation in different strain backgrounds after being  
928 normalized to the induced expression level in the wild type strain as percentages. Effects of transcription  
929 factor deletion on gene activation are visualized by a black-yellow chromatic scale. Transcription  
930 factor(s) dependence for each promoter was illustrated by the colors and symbols as coded in the legend  
931 box.

932 **Fig. 8**

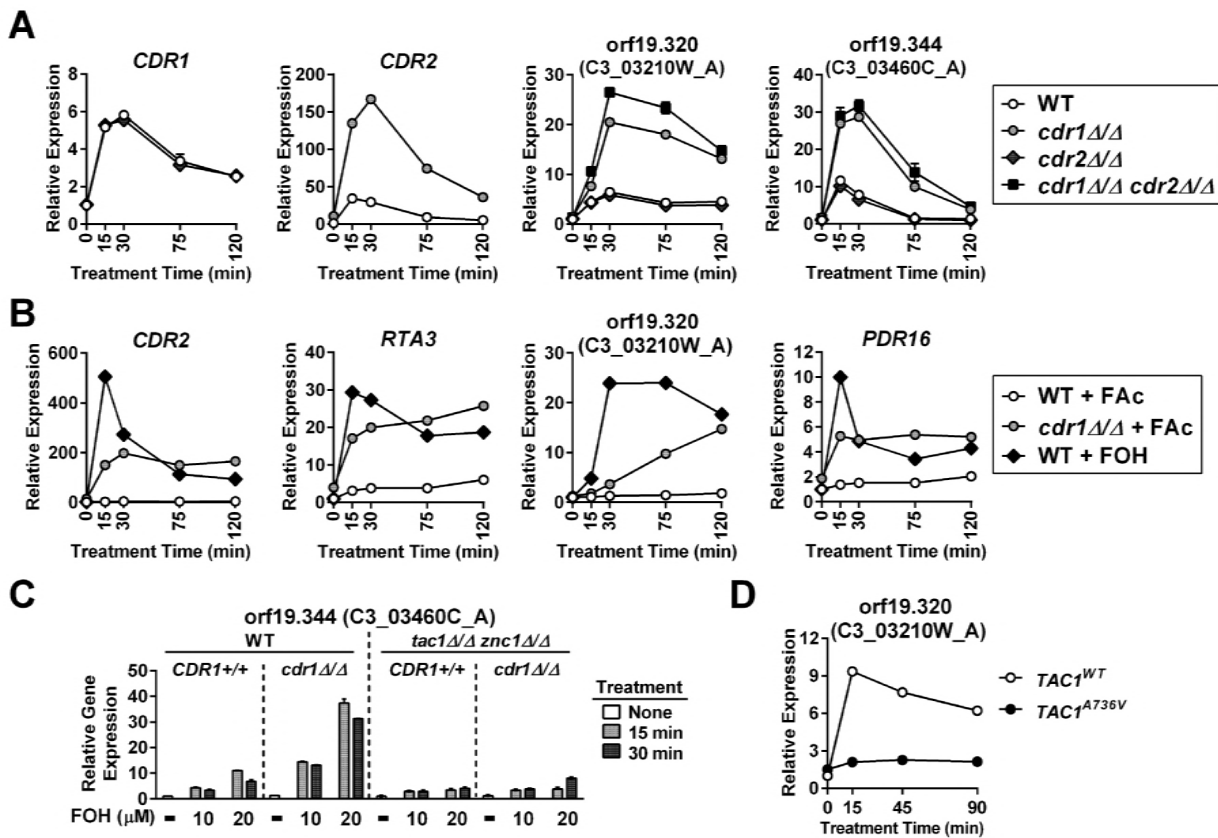

933

934

935 **Fig. 8 Feedback modulation of FOH induction by Cdr1**

936 (A) RT-qPCR analysis of *CDR1*, *CDR2*, *orf19.320* and *orf19.344* mRNA expression in a wild type  
 937 strain (yLM660), and mutant strains carrying a deletion in *cdr1* (yLM708), *cdr2* (yLM709), or both  
 938 (yLM710), after treatment with FOH (20 μM). Expression of each gene in the wild type strain, in the  
 939 absence of treatment, was set to '1'. Symbol legends are denoted in the rightmost box. (B) RT-qPCR  
 940 analysis of *CDR2*, *RTA3*, *orf19.320*, and *PDR16* mRNA expression in wild type (yLM660) and *cdr1*  
 941 null (yLM708) strains treated with 50 μM farnesyl acetate (FAc) or 50 μM FOH. Expression of each  
 942 gene in the wild type strain, in the absence of treatment was set to '1'. Symbol legends are denoted in  
 943 the rightmost box. (C) RT-qPCR analysis of *orf19.344* mRNA expression in *TAC1/ZNC1* wild type  
 944 ('WT'; yLM660 and yLM708) and *tac1Δ/Δ znc1Δ/Δ* (yLM664 and yLM711) strains derived from a wild

945 type or *cdr1Δ/Δ* background, after treatment with increasing concentrations of FOH. Expression of  
946 orf19.344 in the wild type strain (yLM660), in the absence of treatment, was set to '1'. **(D)** RT-qPCR  
947 analysis of orf19.320 mRNA expression in strains carrying a wild type (*TACI*<sup>WT</sup>; yLM167) or a GOF  
948 mutant *TACI* allele (*TACI*<sup>A736V</sup>; yLM169) treated with 16 μM FOH. Expression of orf19.320 in the  
949 *TACI*<sup>WT</sup> strain, in the absence of treatment, was set to '1'.

950 **Fig. 9**

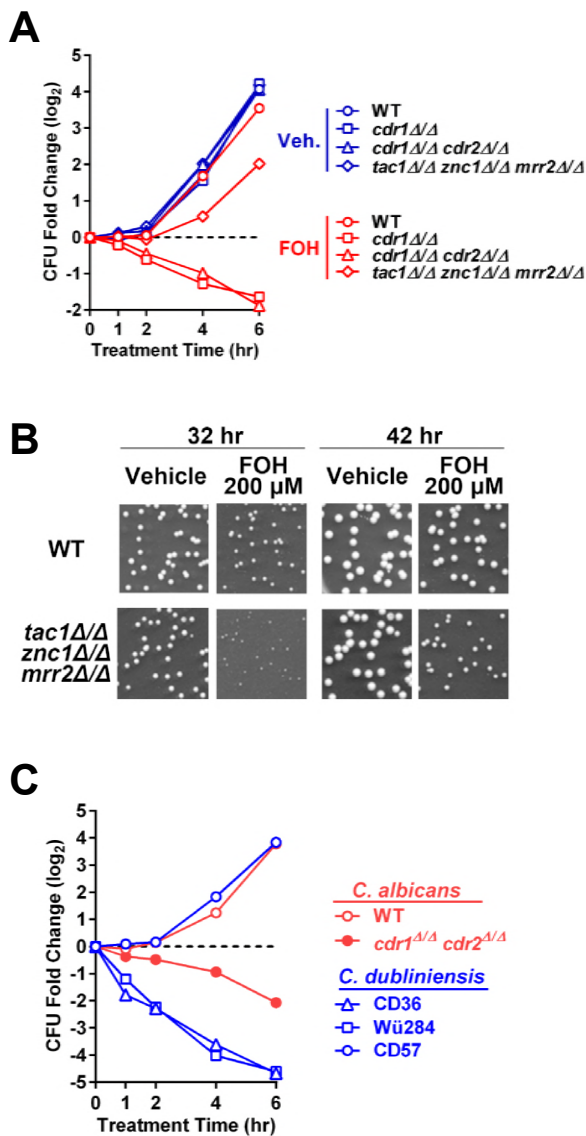

951

952

953 **Fig. 9 Dependence of *C. albicans* and *C. dubliniensis* farnesol sensitivity on *CDR1* expression**

954 (A) Colony formation analysis comparing cell viability between wild type and *cdr1* null strains after one  
 955 to six hours FOH, or vehicle (methanol), exposure. Wild type (yLM660), *cdr1* null (yLM708), *cdr1 cdr2*  
 956 double deletion (yLM710), or *tac1 znc1 mrr2* triple deletion (yLM702) strains were each diluted from  
 957 overnight YPD cultures and treated with 200  $\mu$ M FOH in YPD media. Aliquots, after an appropriate  
 958 dilution (if needed), were spread on YPD plates at the indicated time points. Fold change in colony

959 formation units (CFU) was calculated by setting the CFU before treatment (not shown) to ‘1’ and  
960 presented in a logarithmic form (base 2). **(B)** Representative plate scans showing a high FOH  
961 concentration in agar media reduces colony growth of a *tac1Δ/Δ znc1Δ/Δ mrr2Δ/Δ* strain. Dilutions of a  
962 wild type strain (yLM660) and a *tac1 znc1 mrr2* triple deletion mutant (yLM702) from overnight  
963 cultures were plated on YPD agar supplemented with 200 μM FOH or same volume of vehicle  
964 (methanol). Plates were imaged after incubation for the indicated amount of time at 30°C. **(C)** Colony  
965 formation analysis comparing cell viability between three *C. dubliniensis* strains (CD36, Wü284 and  
966 CD57) after one to six hours FOH, or vehicle (methanol), exposure. Wild type (yLM660) and *cdr1*  
967 *cdr2* double deletion (yLM710) *C. albicans* strains were tested in parallel as a control. The strains  
968 were each diluted from overnight YPD cultures and treated with 200 μM FOH in YPD media. Aliquots,  
969 after an appropriate dilution (if needed), were spread on YPD plates at the indicated time points. Fold  
970 change in CFU was calculated by setting the CFU before treatment (not shown) to ‘1’ and presented in a  
971 logarithmic form (base 2).

972

973 **Fig. 10**

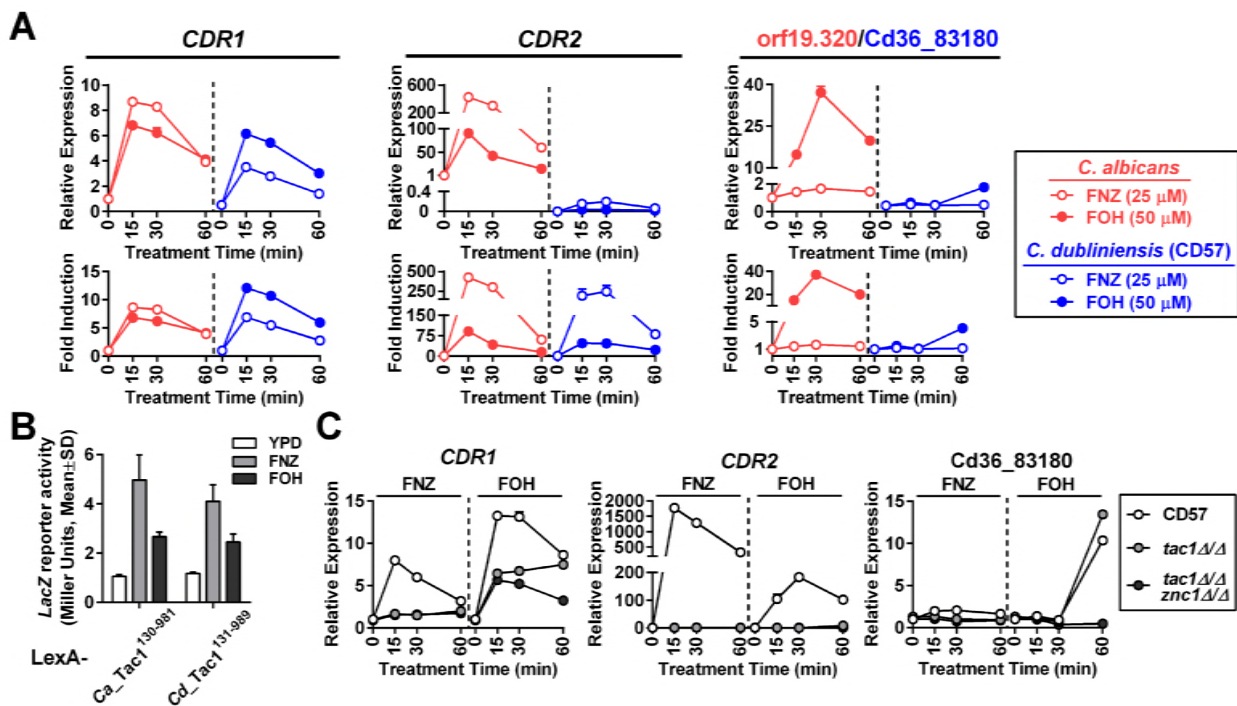

974

975

976 **Fig. 10 Tac1 and Znc1 regulate gene induction by FOH in *C. dubliniensis***

977 **(A)** RT-qPCR analysis comparing FOH induction of *CDR1*, *CDR2* and *orf19.320* orthologs in *C.*  
 978 *albicans* and *C. dubliniensis*. A wild type *C. albicans* strain (yLM660) and a *C. dubliniensis* isolate  
 979 (CD57) were treated with 25  $\mu$ M FNZ and 50  $\mu$ M FOH in YPD culture for the indicated amount of time  
 980 before collection for RNA extraction. Expression of each pair of orthologs was measured by  
 981 pan-primers and compared across species by setting the basal expression in the *C. albicans* strain to ‘1’  
 982 (‘Relative expression’; upper panels). Gene ‘Fold Induction’ in each species was shown in the lower  
 983 panels by setting gene basal expression in yLM660 and CD57 individually to ‘1’. **(B)** LacZ reporter  
 984 activation by CdTac1 under FNZ and FOH treatment conditions. *C. albicans* one hybrid strains  
 985 expressing LexA-CdTac1<sup>131-989</sup> (yLM766) or LexA-CaTac1<sup>130-980</sup> (yLM568) fusion proteins were  
 986 treated with 25  $\mu$ M FNZ or 50  $\mu$ M FOH for 2 hours and measured for  $\beta$ -galactosidase activity. **(C)**

987 RT-qPCR analysis showing the effect of *tac1* deletion and *tac1 znc1* double deletion on FNZ and FOH  
988 induction of *CDR1*, *CDR2* and Cd36.83180 in *C. dubliniensis*. CD57, and its *tac1Δ/Δ* (yLM764) and  
989 *tac1Δ/Δ znc1Δ/Δ* (yLM765) derivatives were treated with 25 μM FNZ and 50 μM FOH. Basal  
990 expression of each gene in CD57 was individually set to '1'.
